# Supplementary material for: 2,5-Furandicarboxylic acid as a linker for lanthanide coordination polymers: the role of heteroaromatic π–π stacking and hydrogen bonding
Source: Royal Society of Chemistry journal article supplement (doi:10.1039/c8nj05701j), 2019-01-01
Supplement: c8nj05701j1.pdf [file c8nj05701j1.pdf]

**Electronic Supplementary Information**

**2,5-furandicarboxylic acid as a linker for lanthanide coordination  
polymers: the role of heteroaromatic  $\pi$ - $\pi$  stacking and hydrogen  
bonding**

Manesh Kumar,<sup>a</sup> Haq Nawaz Sheikh,<sup>a\*</sup> Antonio Fraconetti,<sup>b</sup> Jan K. Zaręba,<sup>c</sup> Subash Chandra Sahoo,<sup>d</sup> and Antonio Frontera,<sup>b</sup>

<sup>a</sup>Department of Chemistry, University of Jammu, Baba Sahib Ambedkar Road, Jammu-180006, India. [hnsheikh@rediffmail.com](mailto:hnsheikh@rediffmail.com)

<sup>b</sup>Department of Chemistry, Universitat de les Illes Balears, 07122 Palma (Balears), Spain.

<sup>c</sup>Advanced Materials Engineering and Modelling Group, Wrocław University of Science and Technology, Wyb. Wyspiańskiego 27, 50370, Wrocław, Poland.

<sup>d</sup>Department of Chemistry & Centre of Advanced Studies in Chemistry, Panjab University, Chandigarh –160 014, India.

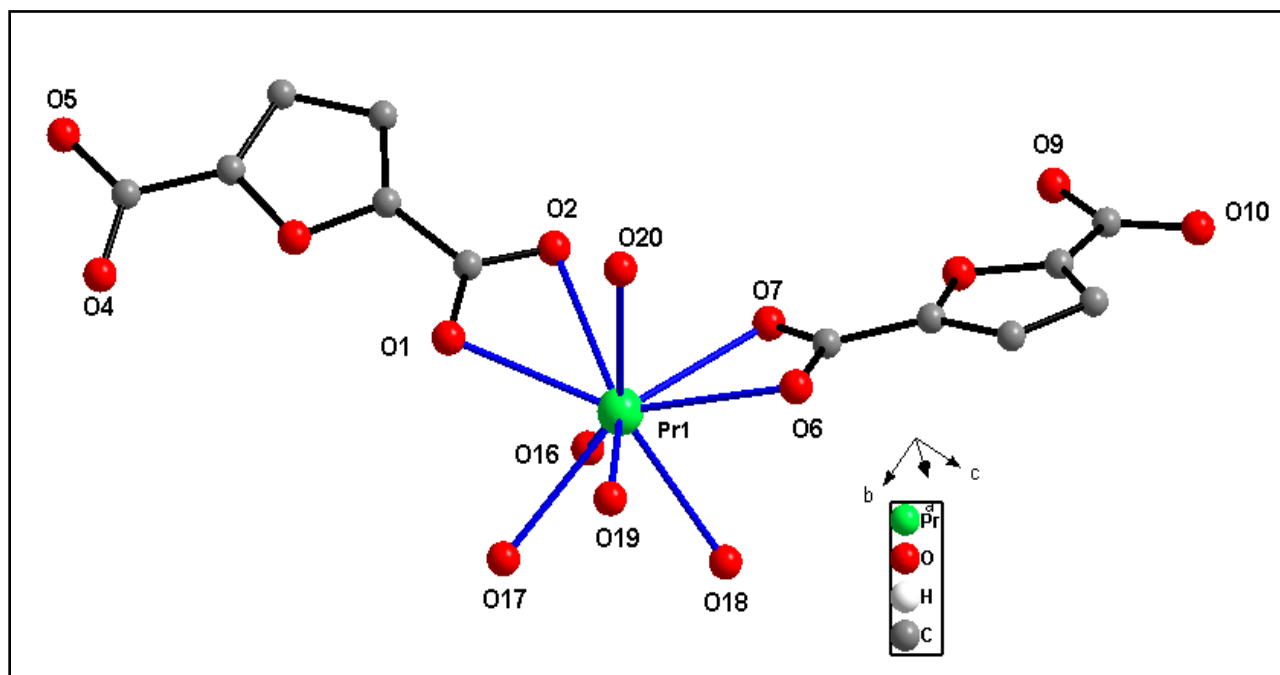

**Fig. S1** Coordination environment of Pr01 in CP 1.

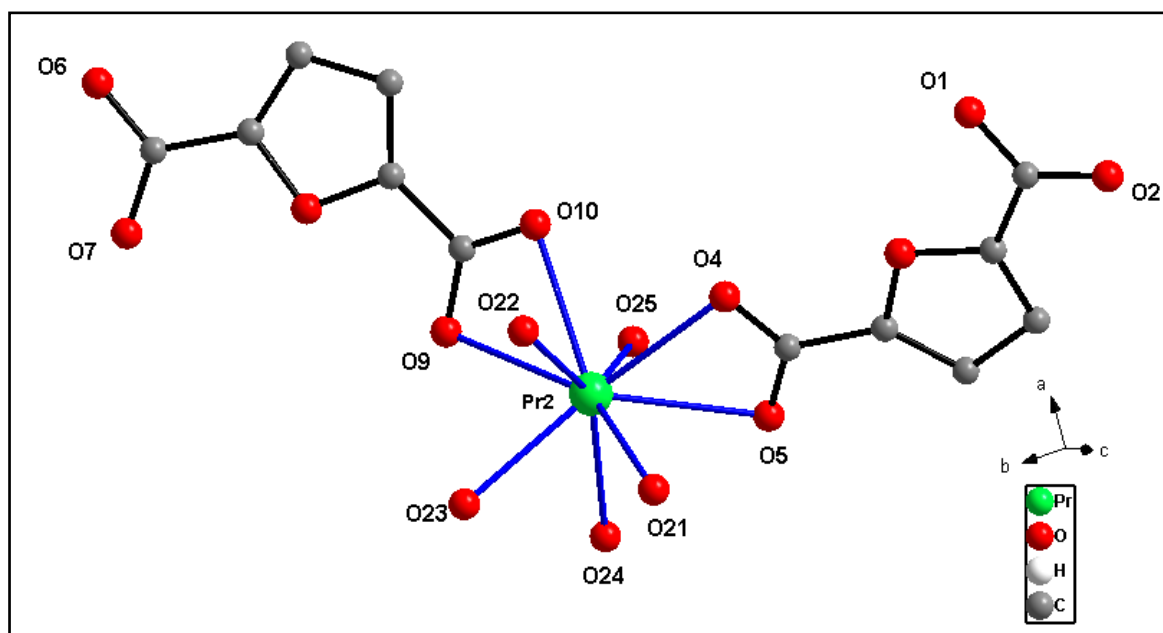

**Fig. S2** Coordination environment of Pr02 in CP 1.

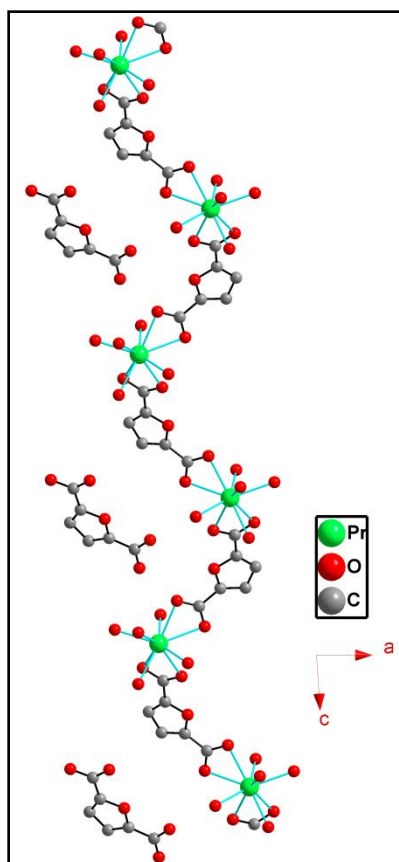

**Fig. S3** Linear extension of 1DCP 1 along b-axis.

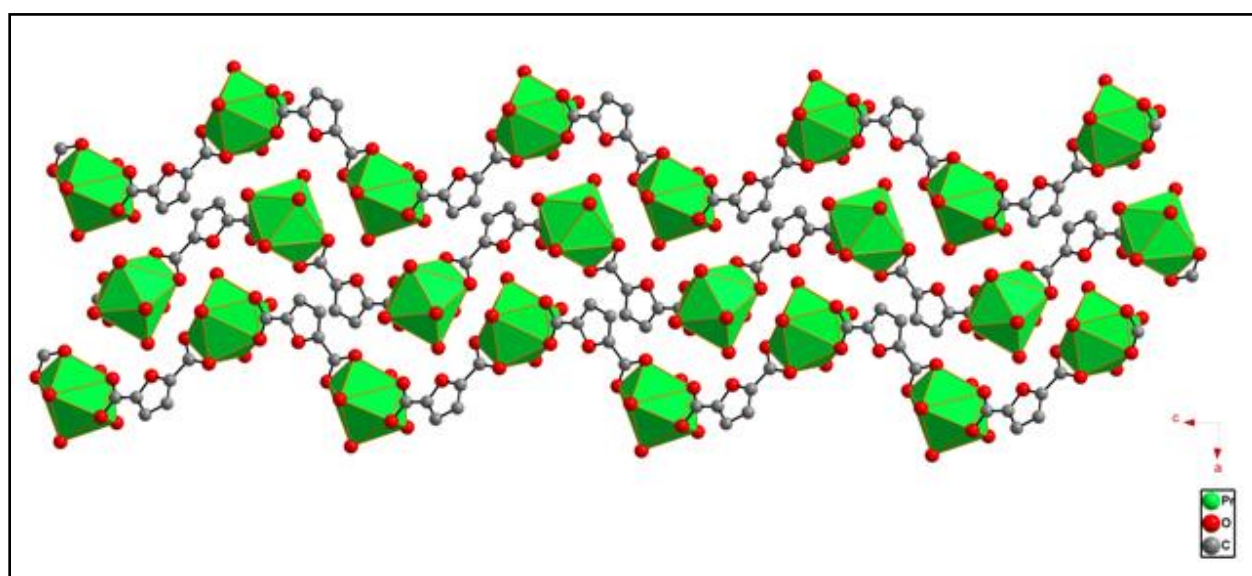

**Fig. S4** Packing of CP1 along b-axis.

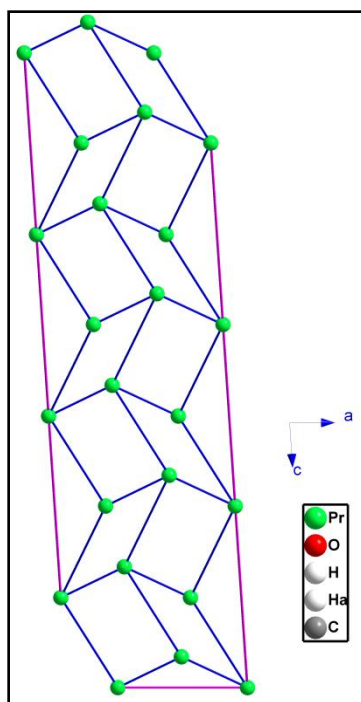

**Fig. S5** 2D (4,4)-Rhombic topological view along b-axis.

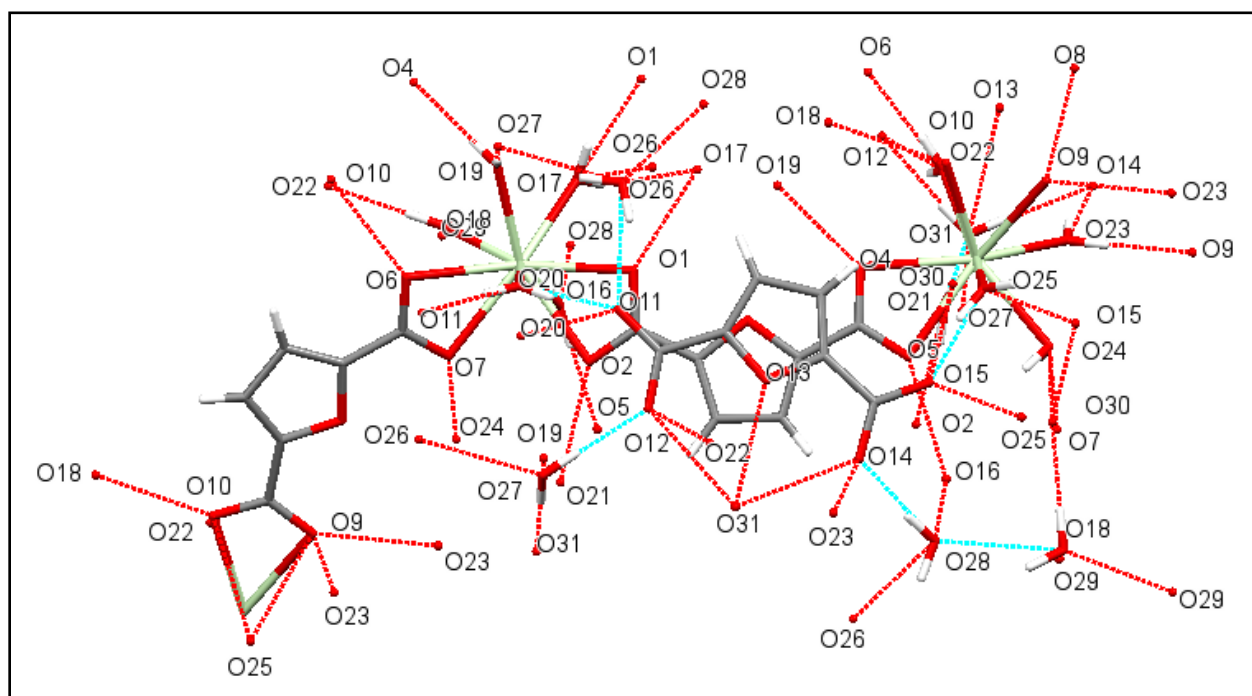

**Fig. S6** Number and positions of hydrogen bonds in CP 1.

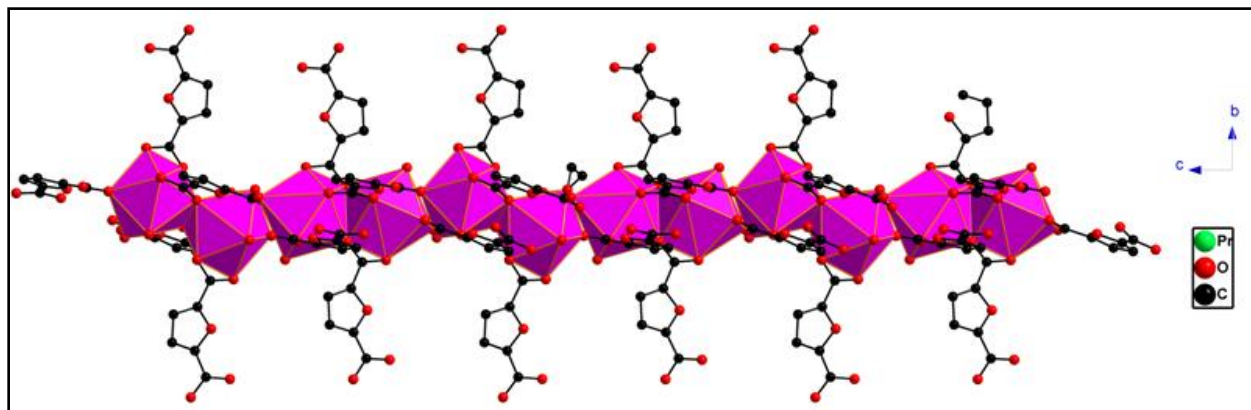

**Fig. S7** Polyheral packing arrangement of CP 2 when viewed along a-axis.

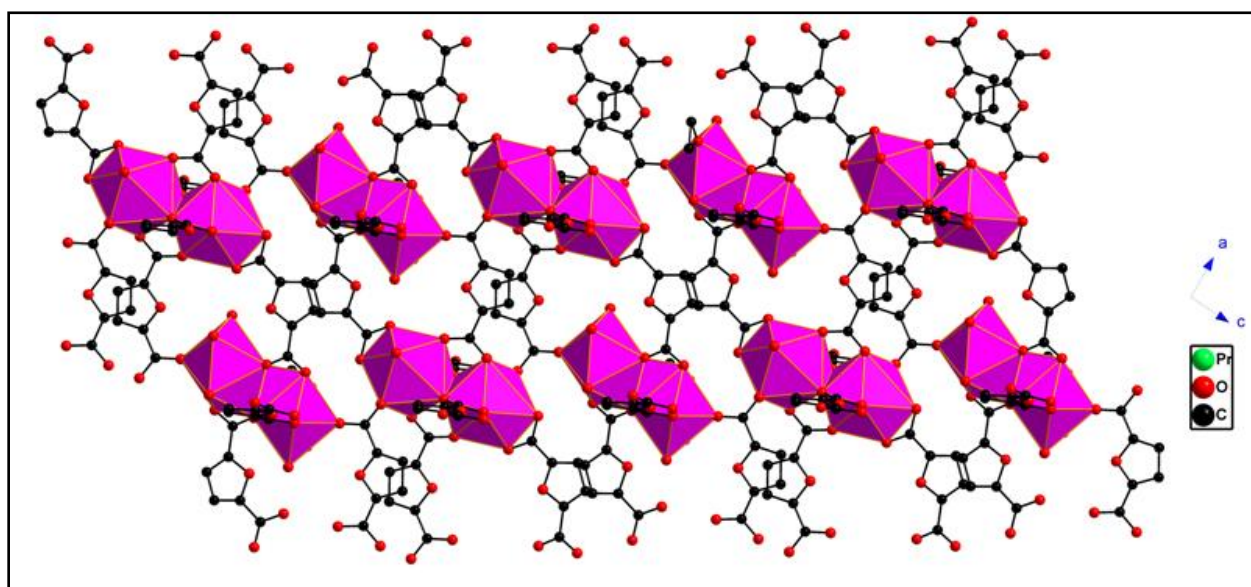

**Fig. S8** Polyheral packing arrangements of CP 2 when viewed along b-axis.



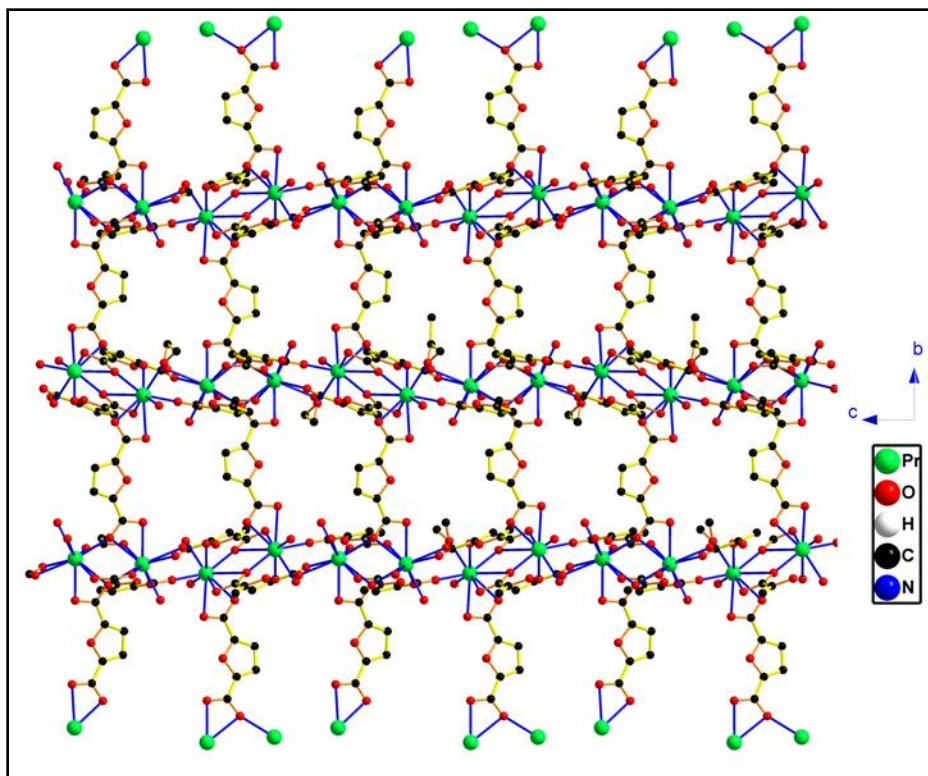

**Fig. S9** Packing in CP2 when view along a-axis.

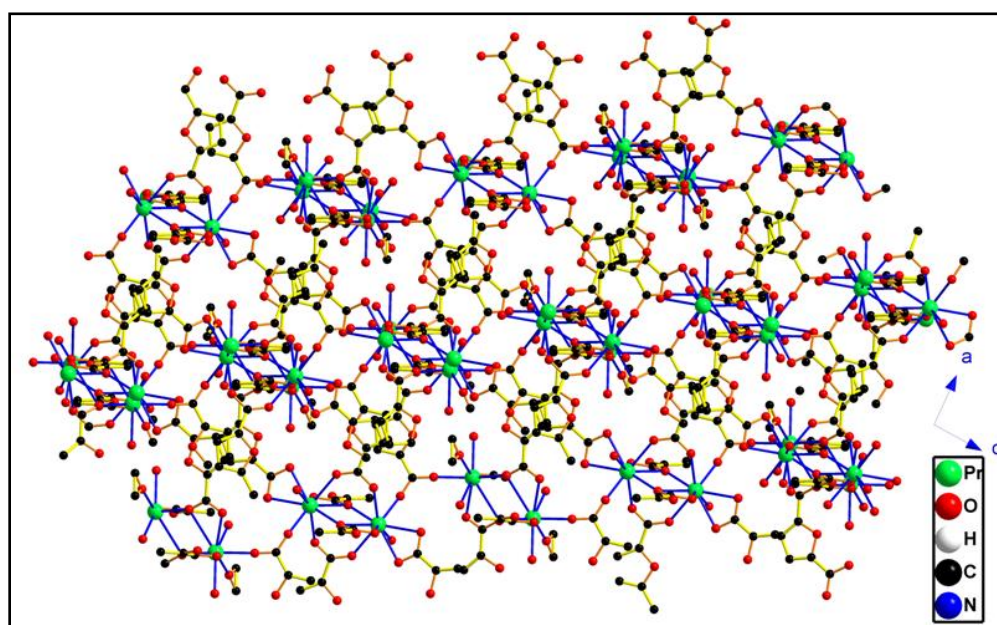

**Fig. S10** Packing in CP2 when view along b-axis.

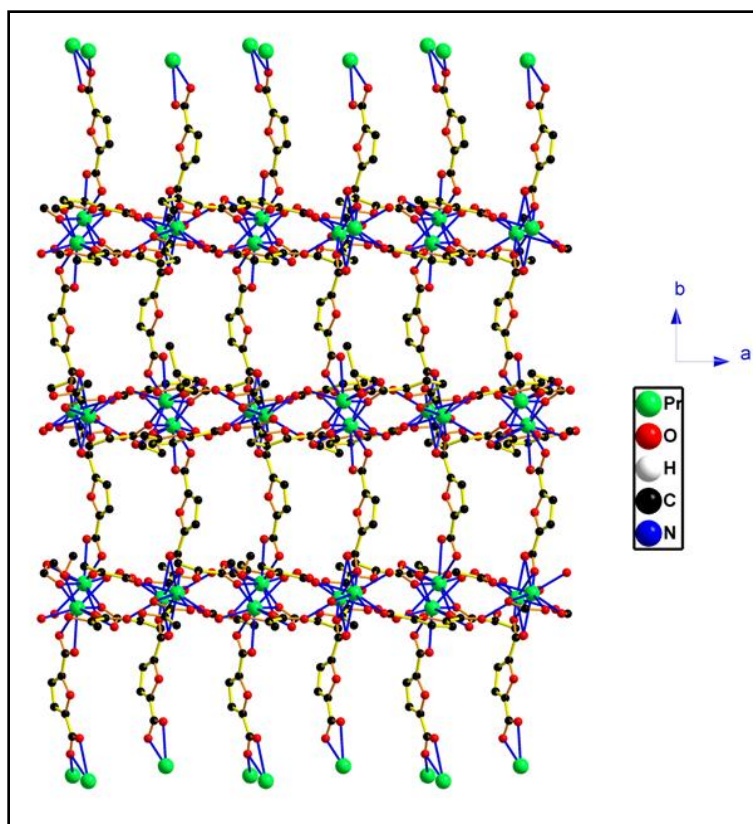

**Fig. S11** Packing in CP2 when view along c-axis.

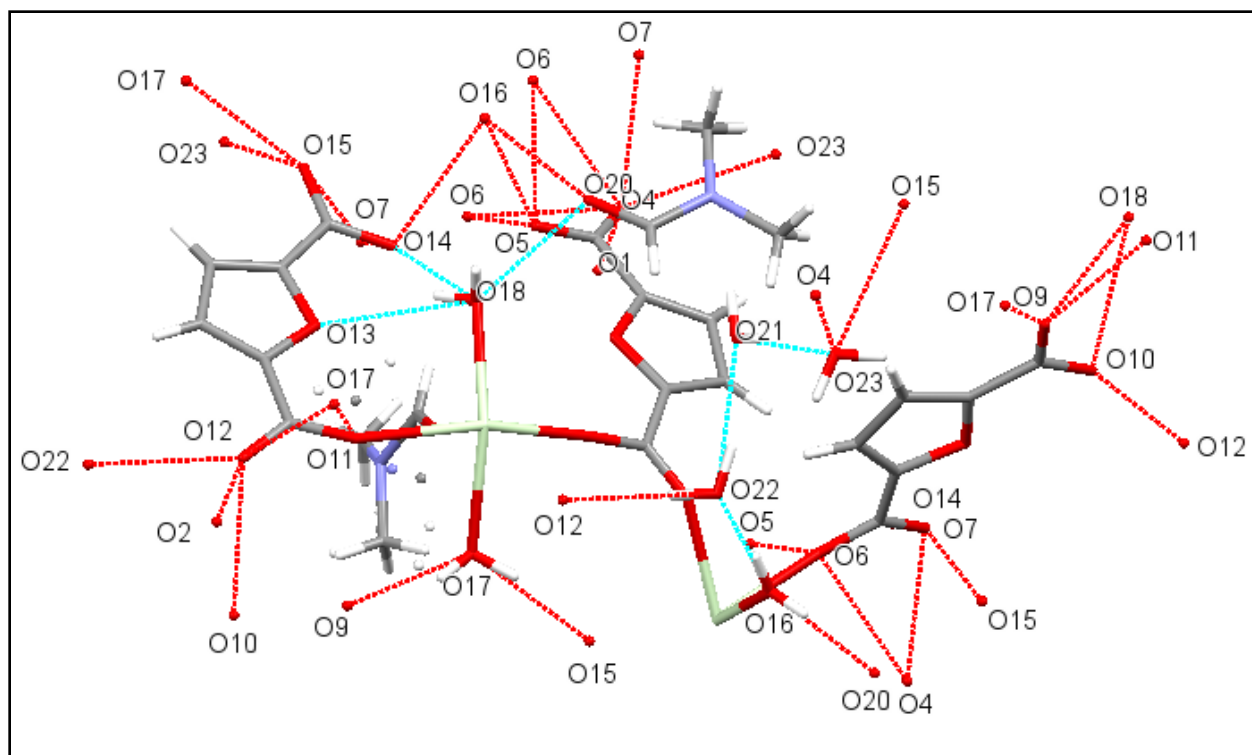

**Fig. S12** Number and positions of Hydrogen bonds in asymmetric unit of CP 2.

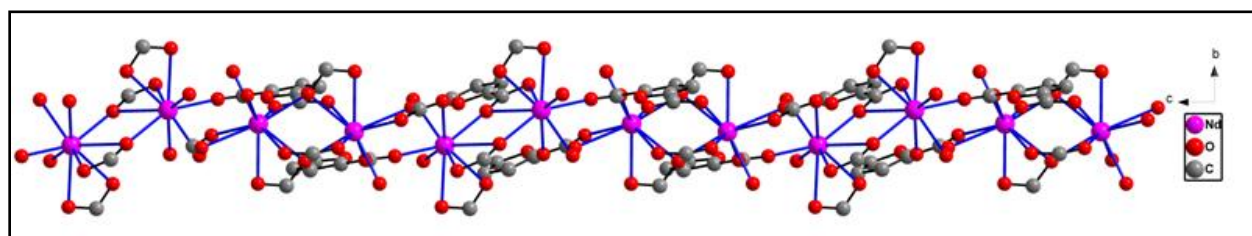

**Fig. S13** Packing in CP 5 when view along a-axis.

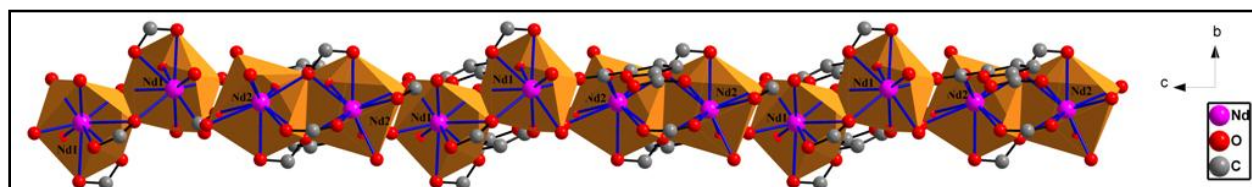

**Fig. S14** Polyheral packing arrangement of CP 5 when viewed along a-axis.



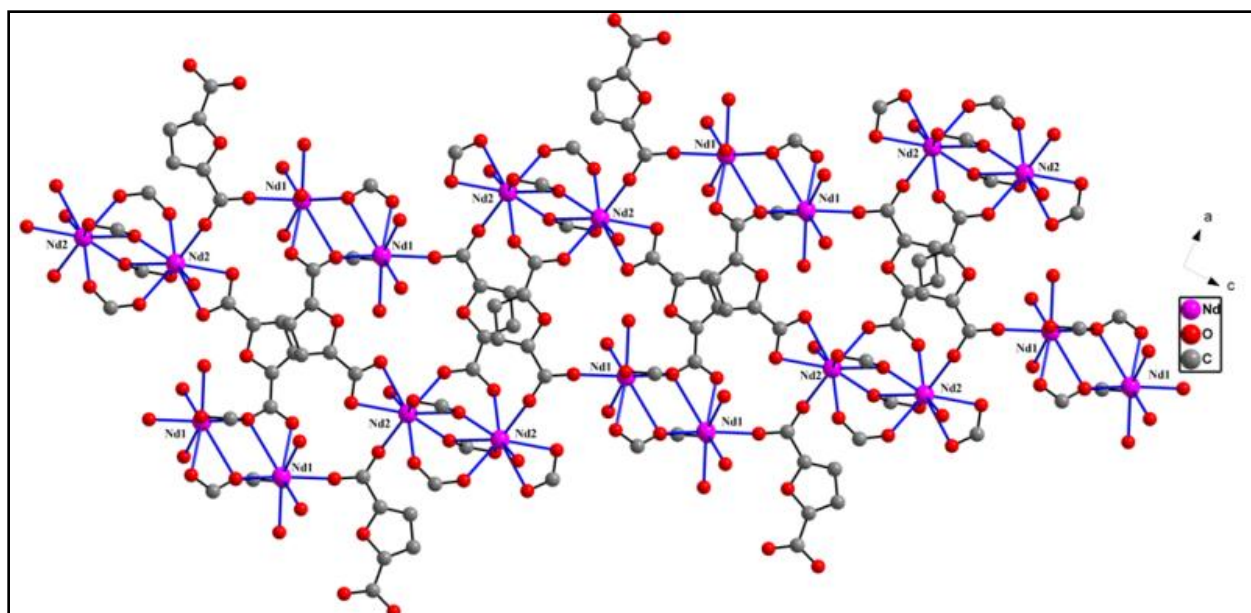

**Fig. S15** Packing in CP 5 when view along b-axis.

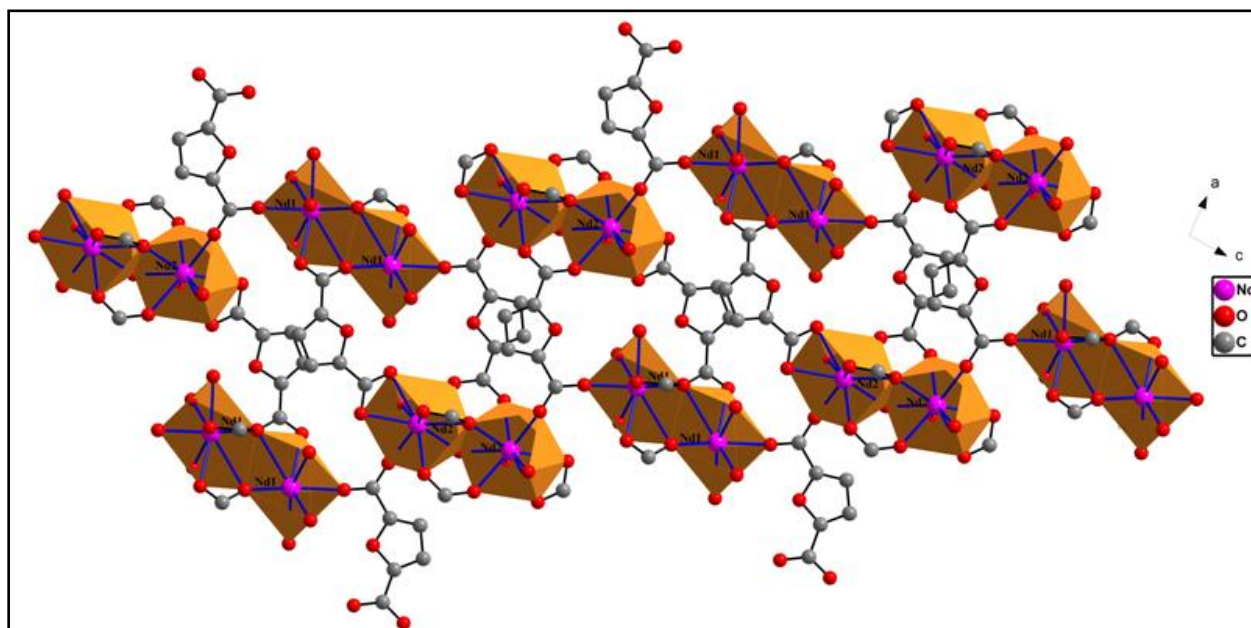

**Fig. S16** Polyhedral packing arrangement of CP 5 when viewed along b-axis.

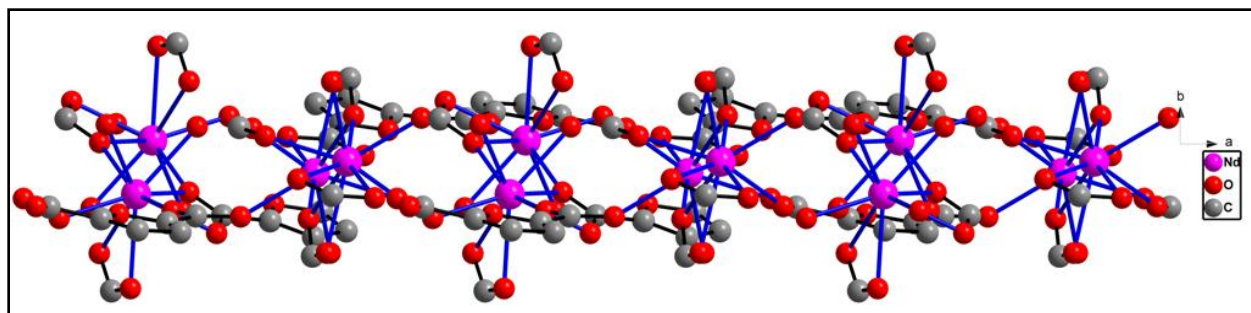

**Fig. S17** Packing in CP **5** when view along c-axis.

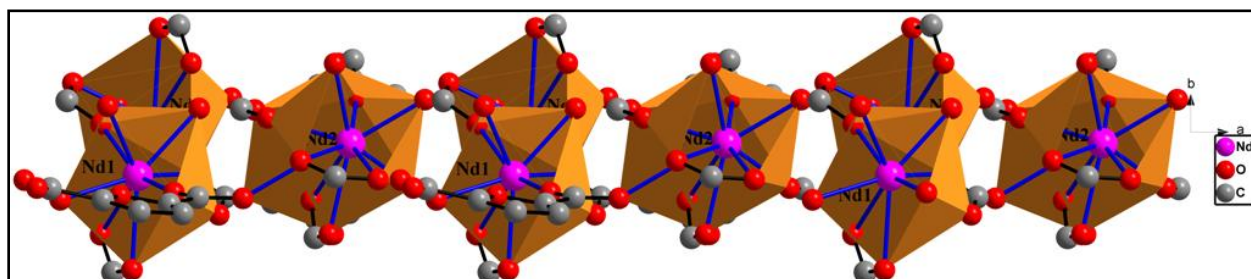

**Fig. S18** Polyhedral packing arrangement of CP **5** when viewed along c-axis.

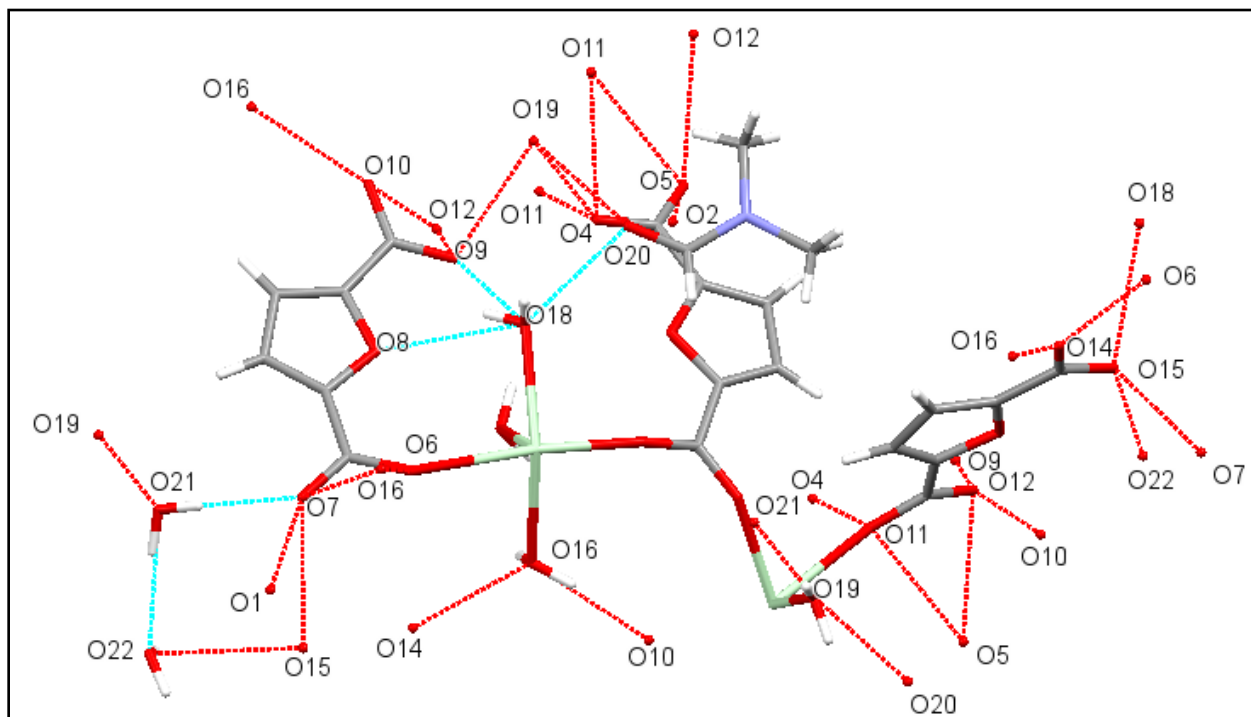

**Fig. S19** Number and positions of Hydrogen bonds in asymmetric unit of CP **5**.

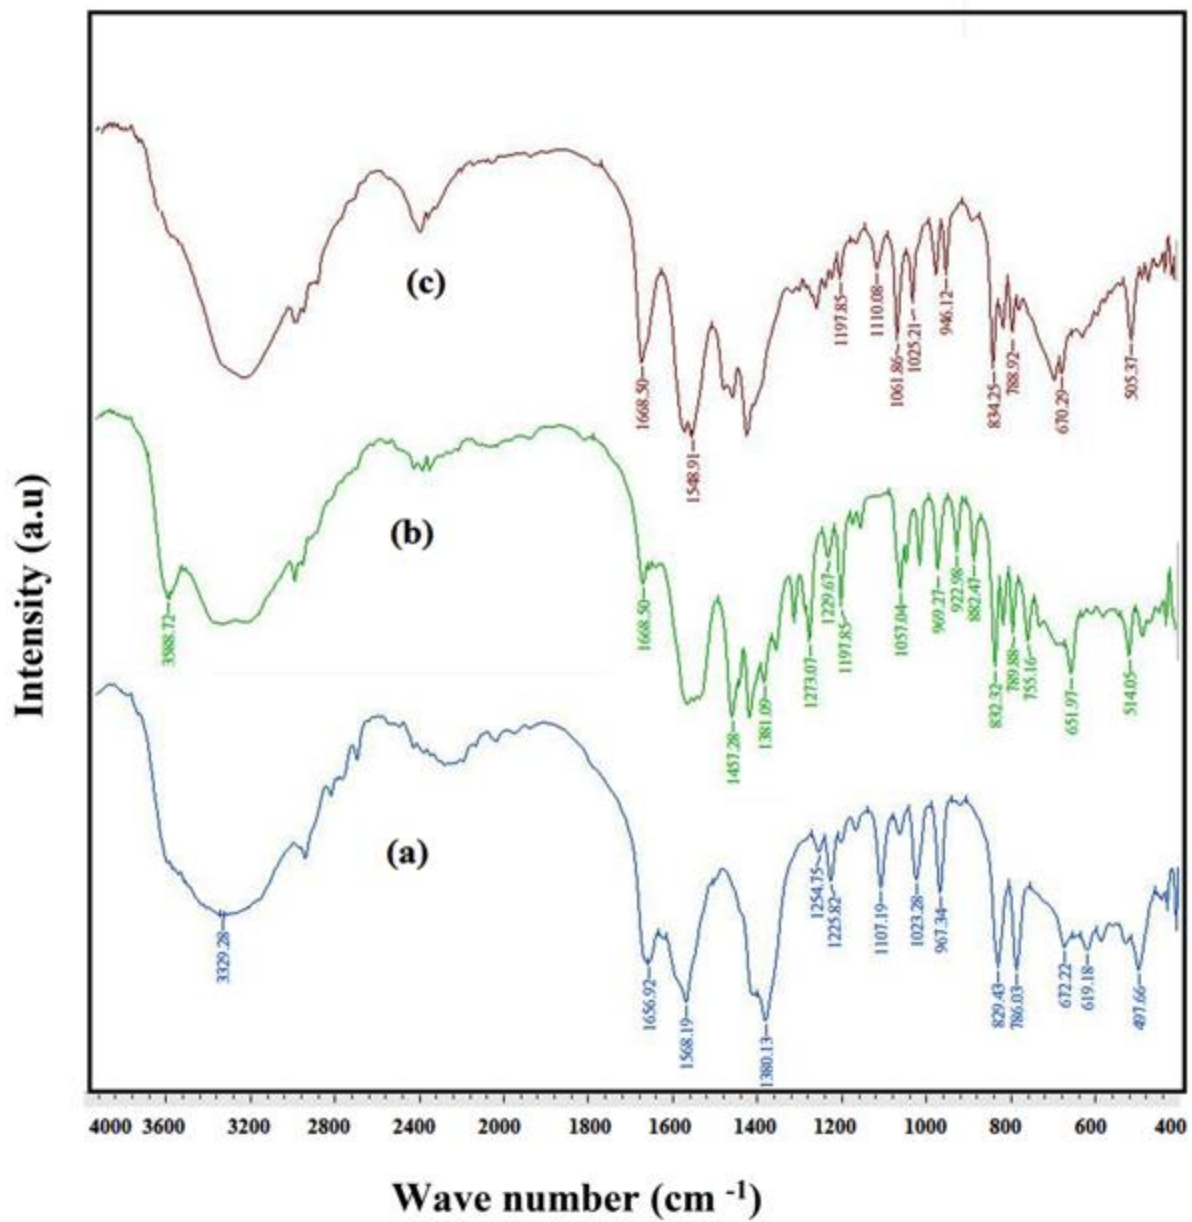

Fig. S20 FT-IR Spectra of CP 1-3; (a) CP 1, (b) CP 2 & (c) CP 3.

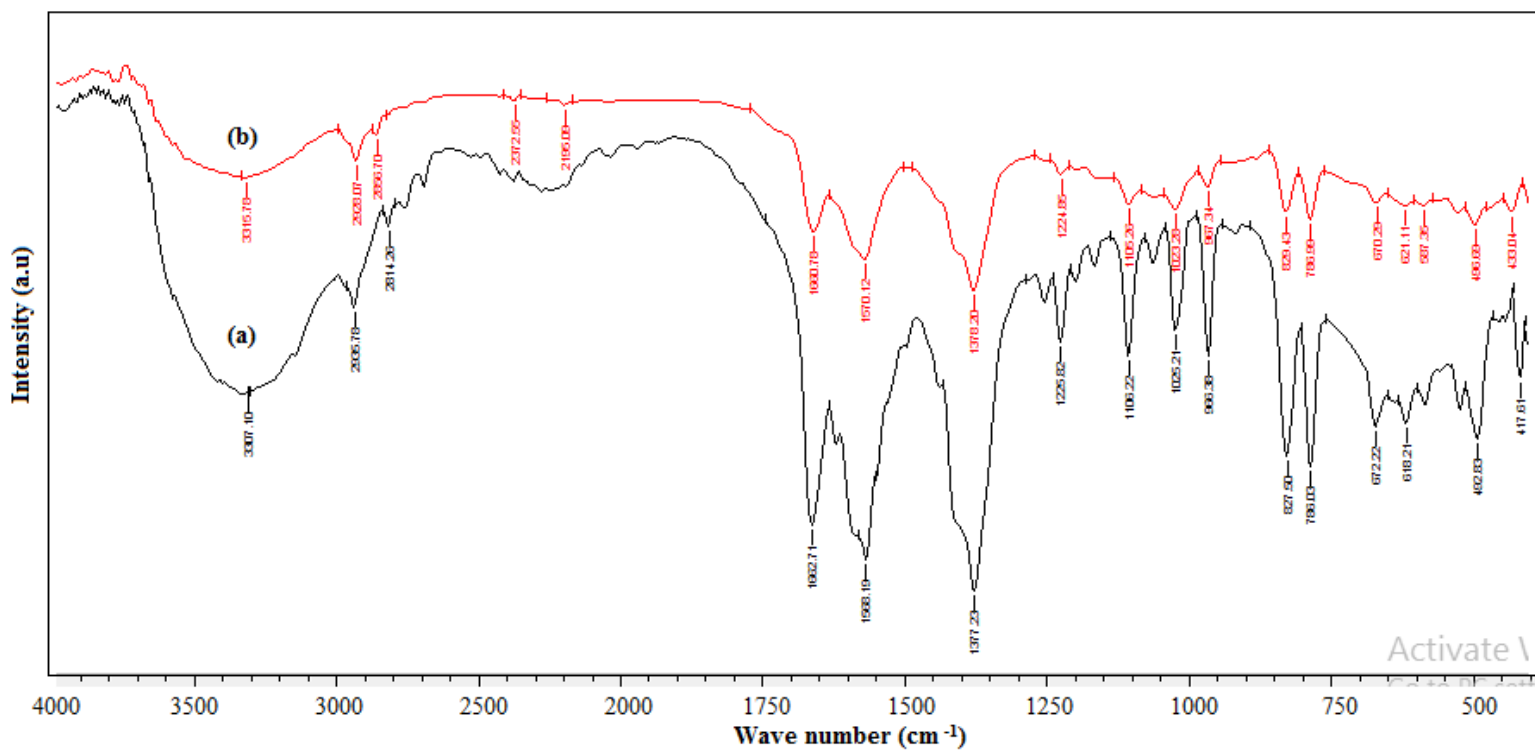

**Fig. S21** FT-IR Spectra of CPs (a) CP 4 & (b) CP 5.

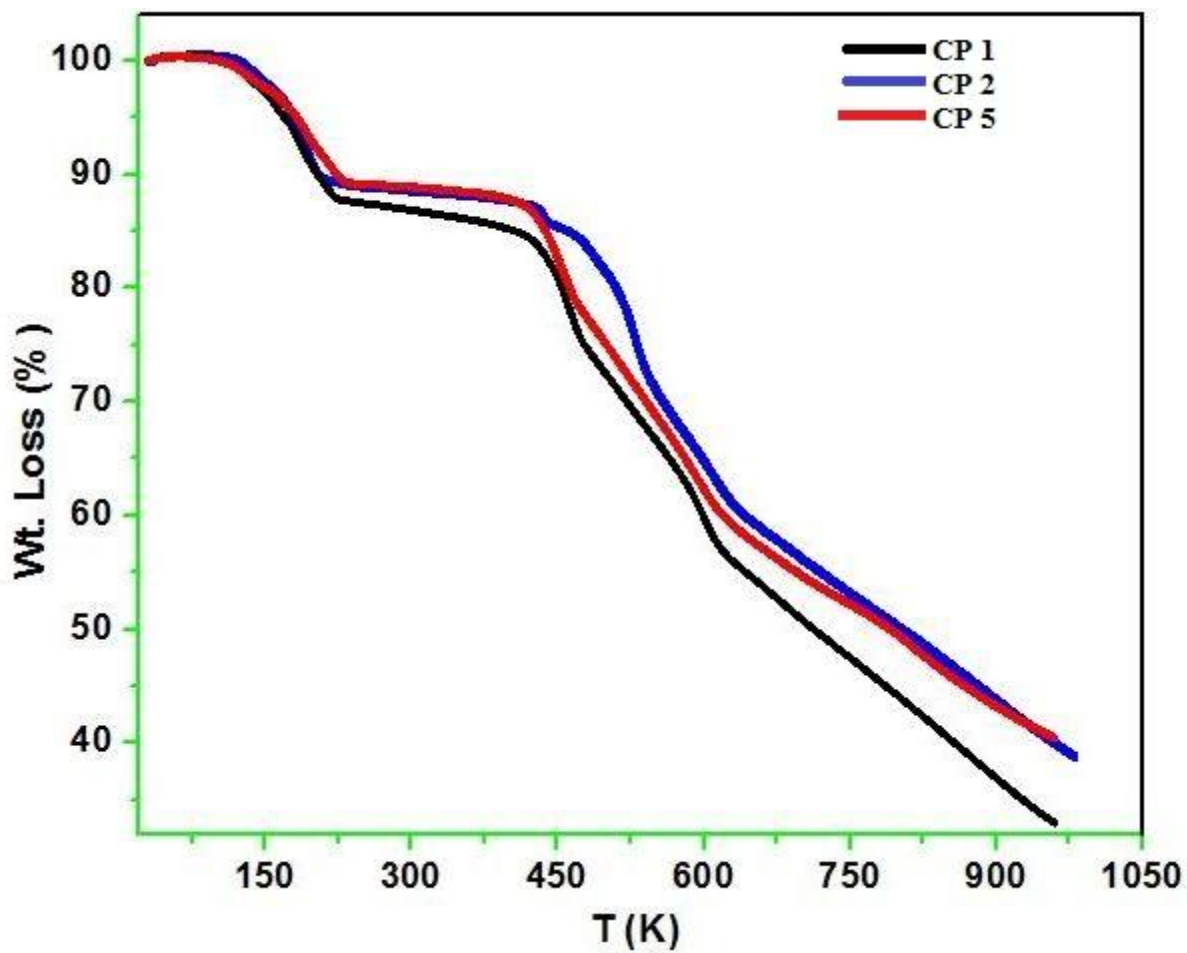

Fig. S22 TGA plots of CP 1 (black color), CP 2 (blue color) & CP 5 (red color).



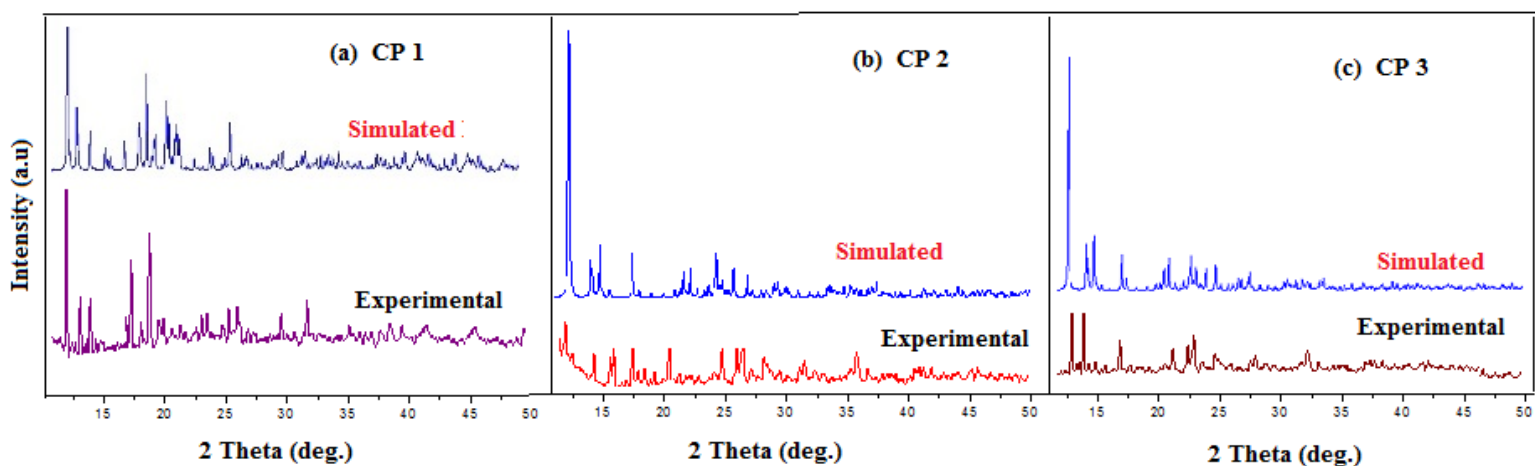

**Fig.S23** Experimental and simulated powder X-ray diffraction pattern for CPs 1–3.

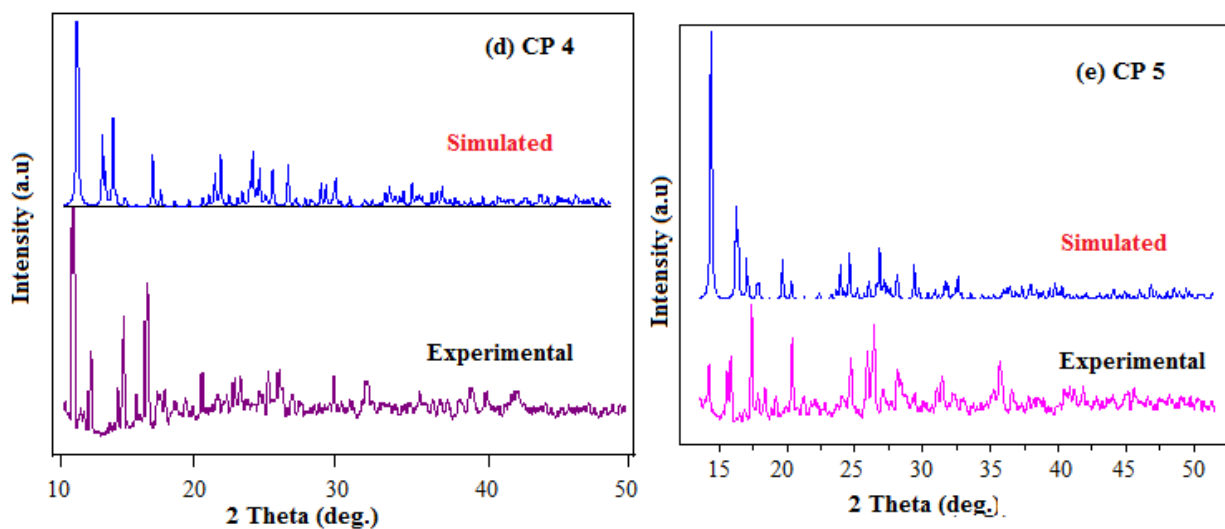

**Fig. S24** Experimental and simulated powder X-ray diffraction pattern for CPs 4 & 5.

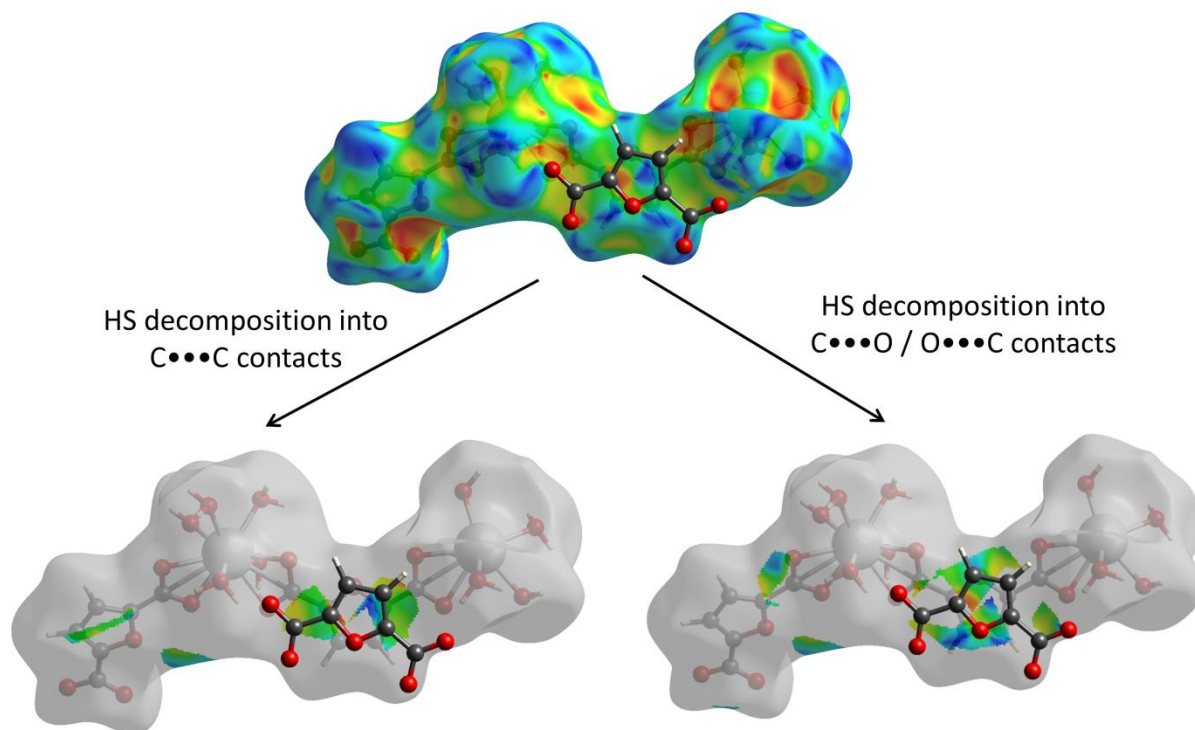

**Fig. S25** Top: shape index-mapped HS generated for CP 1. Down: shape index-mapped contact-decomposed HSs generated for CP 1.

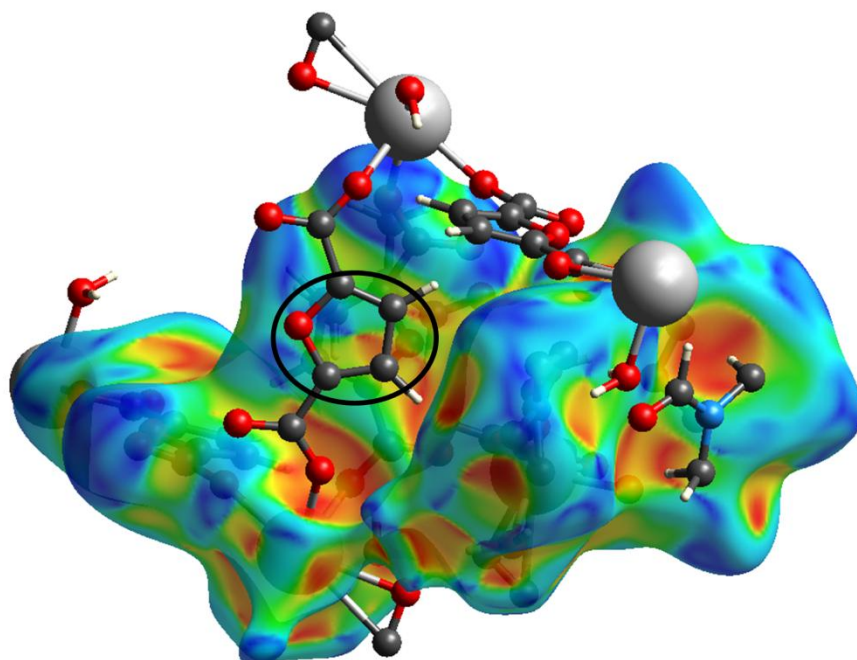

**Fig. S26** Shape index-mapped HS generated for CP 1. (The region of heteroaromatic stacking is indicated with an oval)

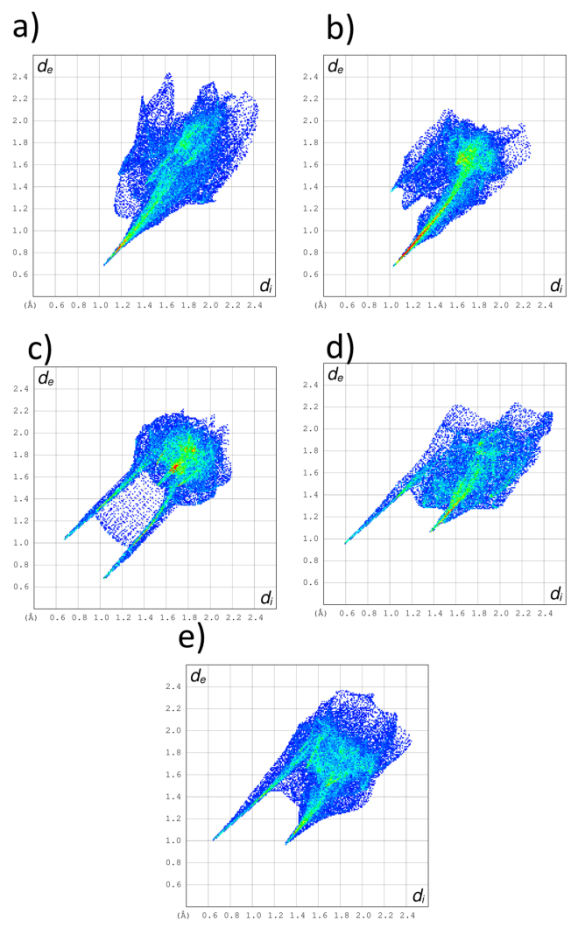

**Fig. S27** 2D fingerprint plots for ( a)CP1, (b) YADGUH, (c) FURDCA, (d) UFALIZ, (e) UFALOF

**Table S1**  
**Selected Bond lengths (Å) for CP 1.**

|                      |           |          |            |
|----------------------|-----------|----------|------------|
| Pr1—O6               | 2.622 (2) | O9—C12   | 1.257 (4)  |
| Pr1—O1               | 2.527 (2) | O21—H21A | 0.825 (17) |
| Pr1—O7               | 2.514 (2) | O21—H21B | 0.839 (17) |
| Pr1—O20              | 2.477 (3) | O23—H23A | 0.824 (17) |
| Pr1—O2               | 2.594 (2) | O23—H23B | 0.863 (18) |
| Pr1—O17              | 2.487 (2) | O13—C17  | 1.359 (4)  |
| Pr1—O19              | 2.462 (2) | O13—C14  | 1.370 (4)  |
| Pr1—O18              | 2.479 (3) | O18—H18A | 0.847 (18) |
| Pr1—O16              | 2.504 (2) | O18—H18B | 0.845 (18) |
| Pr1—C1               | 2.925 (3) | O16—H16A | 0.835 (17) |
| Pr1—C7               | 2.938 (3) | O16—H16B | 0.850 (17) |
| Pr2—O4               | 2.521 (2) | O27—H27A | 0.8500     |
| Pr2—O5               | 2.612 (2) | O27—H27B | 0.8507     |
| Pr2—O24              | 2.453 (2) | O31—H31A | 0.8497     |
| Pr2—H24A             | 2.6204    | O31—H31B | 0.8498     |
| Pr2—O25              | 2.494 (2) | O14—C18  | 1.258 (4)  |
| Pr2—O10 <sup>i</sup> | 2.576 (2) | O11—C13  | 1.269 (4)  |
| Pr2—O22              | 2.500 (2) | O15—C18  | 1.255 (4)  |
| Pr2—O9 <sup>i</sup>  | 2.545 (2) | O26—H26A | 0.8495     |
| Pr2—O21              | 2.479 (2) | O26—H26B | 0.8494     |
| Pr2—O23              | 2.482 (2) | O28—H28A | 0.8496     |

|                      |            |          |           |
|----------------------|------------|----------|-----------|
| Pr2—C6               | 2.933 (3)  | O28—H28B | 0.8500    |
| Pr2—C12 <sup>i</sup> | 2.919 (3)  | C6—C5    | 1.466 (4) |
| O6—C7                | 1.265 (4)  | C1—C2    | 1.474 (4) |
| O4—C6                | 1.260 (4)  | O29—H29A | 0.8497    |
| O3—C2                | 1.361 (4)  | O29—H29B | 0.8501    |
| O3—C5                | 1.366 (3)  | C2—C3    | 1.354 (4) |
| O5—C6                | 1.263 (4)  | C5—C4    | 1.353 (4) |
| O24—H24A             | 0.8590     | C7—C8    | 1.460 (5) |
| O24—H24B             | 0.8607     | C12—C11  | 1.492 (4) |
| O25—H25A             | 0.816 (17) | C8—C9    | 1.345 (5) |
| O25—H25B             | 0.853 (17) | C17—C18  | 1.474 (5) |
| O1—C1                | 1.267 (3)  | C17—C16  | 1.346 (5) |
| O10—C12              | 1.248 (4)  | C14—C15  | 1.341 (5) |
| O8—C8                | 1.372 (4)  | C14—C13  | 1.471 (5) |
| O8—C11               | 1.367 (4)  | C11—C10  | 1.344 (4) |
| O7—C7                | 1.263 (4)  | O12—C13  | 1.258 (4) |
| O20—H20A             | 0.826 (17) | C3—H3    | 0.9300    |
| O20—H20B             | 0.851 (17) | C3—C4    | 1.420 (5) |
| O2—C1                | 1.253 (4)  | C4—H4    | 0.9300    |
| O17—H17A             | 0.812 (17) | C16—H16  | 0.9300    |
| O17—H17B             | 0.828 (18) | C16—C15  | 1.414 (5) |
| O19—H19A             | 0.788 (17) | C9—H9    | 0.9300    |
| O19—H19B             | 0.834 (17) | C9—C10   | 1.408 (5) |



|          |            |         |        |
|----------|------------|---------|--------|
| O22—H22A | 0.844 (17) | C15—H15 | 0.9300 |
| O22—H22B | 0.832 (17) | C10—H10 | 0.9300 |

Symmetry code(s): (i)  $x, y+1, z-1$ .

**Table S2**  
**Selected Bond angles (°) for CP 1.**

|             |            |                            |            |
|-------------|------------|----------------------------|------------|
| O6—Pr1—C1   | 132.80 (8) | O23—Pr2—C12 <sup>i</sup>   | 92.90 (10) |
| O6—Pr1—C7   | 25.49 (7)  | C6—Pr2—H24A                | 95.4       |
| O1—Pr1—O6   | 143.13 (8) | C12 <sup>i</sup> —Pr2—H24A | 135.7      |
| O1—Pr1—O2   | 50.83 (7)  | C12 <sup>i</sup> —Pr2—C6   | 119.13 (9) |
| O1—Pr1—C1   | 25.56 (7)  | C7—O6—Pr1                  | 91.36 (19) |
| O1—Pr1—C7   | 140.46 (8) | C6—O4—Pr2                  | 95.97 (18) |
| O7—Pr1—O6   | 50.72 (7)  | C2—O3—C5                   | 106.3 (2)  |
| O7—Pr1—O1   | 124.90 (7) | C6—O5—Pr2                  | 91.62 (18) |
| O7—Pr1—O2   | 74.44 (7)  | Pr2—O24—H24A               | 91.5       |
| O7—Pr1—C1   | 99.75 (8)  | Pr2—O24—H24B               | 93.3       |
| O7—Pr1—C7   | 25.28 (7)  | H24A—O24—H24B              | 108.9      |
| O20—Pr1—O6  | 69.26 (8)  | Pr2—O25—H25A               | 127 (2)    |
| O20—Pr1—O1  | 73.93 (8)  | Pr2—O25—H25B               | 122 (2)    |
| O20—Pr1—O7  | 85.59 (9)  | H25A—O25—H25B              | 107 (3)    |
| O20—Pr1—O2  | 72.87 (8)  | C1—O1—Pr1                  | 95.05 (19) |
| O20—Pr1—O17 | 126.66 (9) | C12—O10—Pr2 <sup>ii</sup>  | 92.91 (18) |

|             |            |                          |            |
|-------------|------------|--------------------------|------------|
| O20—Pr1—O18 | 137.21 (8) | C11—O8—C8                | 106.2 (2)  |
| O20—Pr1—O16 | 141.88 (8) | C7—O7—Pr1                | 96.48 (19) |
| O20—Pr1—C1  | 73.01 (8)  | Pr1—O20—H20A             | 127 (2)    |
| O20—Pr1—C7  | 77.38 (9)  | Pr1—O20—H20B             | 125 (2)    |
| O2—Pr1—O6   | 113.73 (7) | H20A—O20—H20B            | 106 (3)    |
| O2—Pr1—C1   | 25.35 (8)  | C1—O2—Pr1                | 92.25 (17) |
| O2—Pr1—C7   | 94.93 (8)  | Pr1—O17—H17A             | 126 (2)    |
| O17—Pr1—O6  | 133.79 (8) | Pr1—O17—H17B             | 122 (2)    |
| O17—Pr1—O1  | 72.25 (8)  | H17A—O17—H17B            | 105 (3)    |
| O17—Pr1—O7  | 147.74 (9) | Pr1—O19—H19A             | 121 (2)    |
| O17—Pr1—O2  | 112.48 (8) | Pr1—O19—H19B             | 114 (2)    |
| O17—Pr1—O16 | 72.59 (8)  | H19A—O19—H19B            | 119 (3)    |
| O17—Pr1—C1  | 91.67 (9)  | Pr2—O22—H22A             | 125 (2)    |
| O17—Pr1—C7  | 147.19 (9) | Pr2—O22—H22B             | 126 (2)    |
| O19—Pr1—O6  | 75.92 (8)  | H22A—O22—H22B            | 100 (3)    |
| O19—Pr1—O1  | 97.09 (8)  | C12—O9—Pr2 <sup>ii</sup> | 94.14 (19) |
| O19—Pr1—O7  | 126.63 (8) | Pr2—O21—H21A             | 126 (2)    |
| O19—Pr1—O20 | 75.32 (9)  | Pr2—O21—H21B             | 124 (2)    |
| O19—Pr1—O2  | 139.88 (8) | H21A—O21—H21B            | 105 (3)    |
| O19—Pr1—O17 | 69.42 (8)  | Pr2—O23—H23A             | 130 (2)    |
| O19—Pr1—O18 | 82.50 (9)  | Pr2—O23—H23B             | 124 (2)    |
| O19—Pr1—O16 | 139.43 (8) | H23A—O23—H23B            | 105 (3)    |
| O19—Pr1—C1  | 120.27 (9) | C17—O13—C14              | 107.3 (3)  |

|                         |            |               |            |
|-------------------------|------------|---------------|------------|
| O19—Pr1—C7              | 101.36 (9) | Pr1—O18—H18A  | 127 (2)    |
| O18—Pr1—O6              | 70.07 (8)  | Pr1—O18—H18B  | 126 (2)    |
| O18—Pr1—O1              | 145.91 (9) | H18A—O18—H18B | 107 (3)    |
| O18—Pr1—O7              | 78.94 (10) | Pr1—O16—H16A  | 128 (2)    |
| O18—Pr1—O2              | 137.60 (8) | Pr1—O16—H16B  | 127 (2)    |
| O18—Pr1—O17             | 75.85 (10) | H16A—O16—H16B | 104 (3)    |
| O18—Pr1—O16             | 74.89 (8)  | H27A—O27—H27B | 109.4      |
| O18—Pr1—C1              | 148.70 (8) | H31A—O31—H31B | 109.5      |
| O18—Pr1—C7              | 71.69 (10) | H26A—O26—H26B | 109.6      |
| O16—Pr1—O6              | 124.57 (8) | H28A—O28—H28B | 109.5      |
| O16—Pr1—O1              | 84.32 (8)  | O4—C6—Pr2     | 58.74 (16) |
| O16—Pr1—O7              | 81.69 (8)  | O4—C6—O5      | 121.4 (3)  |
| O16—Pr1—O2              | 69.13 (8)  | O4—C6—C5      | 119.5 (3)  |
| O16—Pr1—C1              | 73.99 (8)  | O5—C6—Pr2     | 62.88 (17) |
| O16—Pr1—C7              | 102.81 (9) | O5—C6—C5      | 119.1 (3)  |
| C1—Pr1—C7               | 118.84 (9) | C5—C6—Pr2     | 173.4 (2)  |
| O4—Pr2—O5               | 50.72 (7)  | O1—C1—Pr1     | 59.39 (16) |
| O4—Pr2—H24A             | 119.3      | O1—C1—C2      | 118.8 (3)  |
| O4—Pr2—O10 <sup>i</sup> | 75.51 (7)  | O2—C1—Pr1     | 62.40 (16) |
| O4—Pr2—O9 <sup>i</sup>  | 125.63 (7) | O2—C1—O1      | 121.5 (3)  |
| O4—Pr2—C6               | 25.29 (7)  | O2—C1—C2      | 119.7 (3)  |
| O4—Pr2—C12 <sup>i</sup> | 100.67 (8) | C2—C1—Pr1     | 172.7 (2)  |
| O5—Pr2—H24A             | 72.1       | H29A—O29—H29B | 109.5      |

|                            |             |                           |            |
|----------------------------|-------------|---------------------------|------------|
| O5—Pr2—C6                  | 25.50 (7)   | O3—C2—C1                  | 116.0 (3)  |
| O5—Pr2—C12 <sup>i</sup>    | 131.87 (8)  | C3—C2—O3                  | 110.7 (3)  |
| O24—Pr2—O4                 | 125.25 (8)  | C3—C2—C1                  | 133.3 (3)  |
| O24—Pr2—O5                 | 74.57 (8)   | O3—C5—C6                  | 115.9 (3)  |
| O24—Pr2—H24A               | 19.1        | C4—C5—O3                  | 110.3 (3)  |
| O24—Pr2—O25                | 74.38 (9)   | C4—C5—C6                  | 133.8 (3)  |
| O24—Pr2—O10 <sup>i</sup>   | 139.49 (9)  | O6—C7—Pr1                 | 63.15 (17) |
| O24—Pr2—O22                | 142.56 (8)  | O6—C7—C8                  | 119.6 (3)  |
| O24—Pr2—O9 <sup>i</sup>    | 96.82 (8)   | O7—C7—Pr1                 | 58.23 (17) |
| O24—Pr2—O21                | 84.81 (9)   | O7—C7—O6                  | 121.2 (3)  |
| O24—Pr2—O23                | 69.30 (9)   | O7—C7—C8                  | 119.2 (3)  |
| O24—Pr2—C6                 | 99.96 (9)   | C8—C7—Pr1                 | 173.1 (2)  |
| O24—Pr2—C12 <sup>i</sup>   | 119.77 (10) | O10—C12—Pr2 <sup>ii</sup> | 61.81 (16) |
| O25—Pr2—O4                 | 87.19 (8)   | O10—C12—O9                | 122.0 (3)  |
| O25—Pr2—O5                 | 69.92 (8)   | O10—C12—C11               | 118.6 (3)  |
| O25—Pr2—H24A               | 91.5        | O9—C12—Pr2 <sup>ii</sup>  | 60.41 (16) |
| O25—Pr2—O10 <sup>i</sup>   | 72.42 (9)   | O9—C12—C11                | 119.4 (3)  |
| O25—Pr2—O22                | 140.14 (8)  | C11—C12—Pr2 <sup>ii</sup> | 174.2 (2)  |
| O25—Pr2—O9 <sup>i</sup>    | 71.41 (8)   | O8—C8—C7                  | 116.3 (3)  |
| O25—Pr2—C6                 | 78.78 (9)   | C9—C8—O8                  | 109.4 (3)  |
| O25—Pr2—C12 <sup>i</sup>   | 71.08 (9)   | C9—C8—C7                  | 134.2 (3)  |
| O10 <sup>i</sup> —Pr2—O5   | 113.88 (7)  | O13—C17—C18               | 114.6 (3)  |
| O10 <sup>i</sup> —Pr2—H24A | 158.2       | C16—C17—O13               | 109.5 (3)  |

|                                        |            |             |           |
|----------------------------------------|------------|-------------|-----------|
| O10 <sup>i</sup> —Pr2—C6               | 95.71 (8)  | C16—C17—C18 | 135.8 (3) |
| O10 <sup>i</sup> —Pr2—C12 <sup>i</sup> | 25.28 (8)  | O13—C14—C13 | 113.3 (3) |
| O22—Pr2—O4                             | 79.59 (8)  | C15—C14—O13 | 109.3 (3) |
| O22—Pr2—O5                             | 123.73 (8) | C15—C14—C13 | 137.4 (3) |
| O22—Pr2—H24A                           | 127.7      | O8—C11—C12  | 115.5 (3) |
| O22—Pr2—O10 <sup>i</sup>               | 67.90 (8)  | C10—C11—O8  | 110.5 (3) |
| O22—Pr2—O9 <sup>i</sup>                | 86.15 (8)  | C10—C11—C12 | 133.8 (3) |
| O22—Pr2—C6                             | 101.21 (9) | O14—C18—C17 | 117.4 (3) |
| O22—Pr2—C12 <sup>i</sup>               | 74.69 (8)  | O15—C18—O14 | 124.9 (3) |
| O9 <sup>i</sup> —Pr2—O5                | 141.29 (8) | O15—C18—C17 | 117.8 (3) |
| O9 <sup>i</sup> —Pr2—H24A              | 110.9      | C2—C3—H3    | 127.0     |
| O9 <sup>i</sup> —Pr2—O10 <sup>i</sup>  | 50.67 (7)  | C2—C3—C4    | 106.1 (3) |
| O9 <sup>i</sup> —Pr2—C6                | 140.19 (8) | C4—C3—H3    | 127.0     |
| O9 <sup>i</sup> —Pr2—C12 <sup>i</sup>  | 25.44 (8)  | C5—C4—C3    | 106.6 (3) |
| O21—Pr2—O4                             | 77.43 (9)  | C5—C4—H4    | 126.7     |
| O21—Pr2—O5                             | 71.85 (8)  | C3—C4—H4    | 126.7     |
| O21—Pr2—H24A                           | 65.8       | C17—C16—H16 | 126.6     |
| O21—Pr2—O25                            | 140.05 (8) | C17—C16—C15 | 106.8 (3) |
| O21—Pr2—O10 <sup>i</sup>               | 135.69 (8) | C15—C16—H16 | 126.6     |
| O21—Pr2—O22                            | 73.18 (8)  | C8—C9—H9    | 126.2     |
| O21—Pr2—O9 <sup>i</sup>                | 146.12 (8) | C8—C9—C10   | 107.7 (3) |
| O21—Pr2—O23                            | 75.56 (10) | C10—C9—H9   | 126.2     |
| O21—Pr2—C6                             | 71.62 (9)  | C14—C15—C16 | 107.1 (3) |



|                          |            |             |           |
|--------------------------|------------|-------------|-----------|
| O21—Pr2—C12 <sup>i</sup> | 147.62 (9) | C14—C15—H15 | 126.5     |
| O23—Pr2—O4               | 147.74 (8) | C16—C15—H15 | 126.5     |
| O23—Pr2—O5               | 132.80 (9) | C11—C10—C9  | 106.2 (3) |
| O23—Pr2—H24A             | 63.7       | C11—C10—H10 | 126.9     |
| O23—Pr2—O25              | 125.01 (9) | C9—C10—H10  | 126.9     |
| O23—Pr2—O10 <sup>i</sup> | 113.30 (9) | O11—C13—C14 | 117.6 (3) |
| O23—Pr2—O22              | 75.98 (8)  | O12—C13—O11 | 124.6 (4) |
| O23—Pr2—O9 <sup>i</sup>  | 73.51 (9)  | O12—C13—C14 | 117.7 (3) |
| O23—Pr2—C6               | 146.30 (9) |             |           |

---

Symmetry code(s): (i)  $x, y+1, z-1$ ; (ii)  $x, y-1, z+1$ .

**Table S3**  
**Number and positions of Hydrogen bonds [ $\text{\AA}$  and  $^\circ$ ] of CP 1.**

| $D-H\cdots A$                        | $D-H$ ( $\text{\AA}$ ) | $H\cdots A$ ( $\text{\AA}$ ) | $D\cdots A$ ( $\text{\AA}$ ) | $D-H\cdots A$ ( $^\circ$ ) |
|--------------------------------------|------------------------|------------------------------|------------------------------|----------------------------|
| O24—H24A $\cdots$ O7 <sup>i</sup>    | 0.86                   | 2.04                         | 2.741 (3)                    | 138.0                      |
| O24—H24B $\cdots$ O30                | 0.86                   | 2.12                         | 2.750 (4)                    | 129.5                      |
| O25—H25A $\cdots$ O15 <sup>ii</sup>  | 0.816 (17)             | 2.07 (2)                     | 2.803 (4)                    | 148 (3)                    |
| O25—H25B $\cdots$ O15                | 0.853 (17)             | 1.908 (18)                   | 2.737 (4)                    | 164 (3)                    |
| O20—H20A $\cdots$ O11                | 0.826 (17)             | 1.970 (18)                   | 2.789 (4)                    | 170 (4)                    |
| O20—H20B $\cdots$ O11 <sup>iii</sup> | 0.851 (17)             | 1.979 (18)                   | 2.820 (4)                    | 170 (3)                    |
| O17—H17A $\cdots$ O26 <sup>iv</sup>  | 0.812 (17)             | 1.998 (19)                   | 2.781 (4)                    | 162 (3)                    |
| O17—H17B $\cdots$ O1 <sup>iv</sup>   | 0.828 (18)             | 1.98 (2)                     | 2.776 (3)                    | 160 (4)                    |
| O19—H19A $\cdots$ O27 <sup>iii</sup> | 0.788 (17)             | 2.031 (18)                   | 2.819 (4)                    | 178 (3)                    |
| O19—H19B $\cdots$ O4 <sup>iv</sup>   | 0.834 (17)             | 1.943 (18)                   | 2.768 (3)                    | 170 (3)                    |
| O22—H22B $\cdots$ O6 <sup>iv</sup>   | 0.832 (17)             | 1.911 (18)                   | 2.735 (3)                    | 171 (4)                    |
| O21—H21A $\cdots$ O31                | 0.825 (17)             | 1.978 (19)                   | 2.789 (4)                    | 167 (3)                    |
| O21—H21B $\cdots$ O2 <sup>i</sup>    | 0.839 (17)             | 1.869 (18)                   | 2.703 (3)                    | 172 (4)                    |
| O23—H23A $\cdots$ O14 <sup>v</sup>   | 0.824 (17)             | 1.972 (18)                   | 2.780 (4)                    | 167 (3)                    |
| O23—H23B $\cdots$ O9 <sup>i</sup>    | 0.863 (18)             | 1.914 (18)                   | 2.774 (3)                    | 174 (3)                    |
| O18—H18A $\cdots$ O29 <sup>i</sup>   | 0.847 (18)             | 1.96 (2)                     | 2.780 (4)                    | 161 (4)                    |
| O18—H18B $\cdots$ O10 <sup>vi</sup>  | 0.845 (18)             | 1.864 (18)                   | 2.709 (3)                    | 178 (4)                    |
| O16—H16A $\cdots$ O28 <sup>i</sup>   | 0.835 (17)             | 2.011 (19)                   | 2.834 (4)                    | 168 (4)                    |
| O16—H16B $\cdots$ O5 <sup>i</sup>    | 0.850 (17)             | 1.940 (18)                   | 2.789 (3)                    | 177 (3)                    |
| O27—H27A $\cdots$ O31 <sup>i</sup>   | 0.85                   | 1.93                         | 2.779 (4)                    | 175.3                      |

|                               |      |      |           |       |
|-------------------------------|------|------|-----------|-------|
| O27—H27B···O12                | 0.85 | 1.86 | 2.708 (4) | 176.2 |
| O31—H31B···O12 <sup>v</sup>   | 0.85 | 2.01 | 2.859 (4) | 175.3 |
| O26—H26A···O11                | 0.85 | 1.97 | 2.739 (4) | 149.1 |
| O26—H26B···O27 <sup>iii</sup> | 0.85 | 1.95 | 2.780 (4) | 166.2 |
| O28—H28A···O14                | 0.85 | 1.92 | 2.765 (3) | 171.2 |
| O28—H28B···O26 <sup>vii</sup> | 0.85 | 2.13 | 2.743 (4) | 128.2 |
| O29—H29A···O28                | 0.85 | 2.11 | 2.780 (4) | 134.9 |
| O29—H29B···O30                | 0.85 | 1.93 | 2.775 (5) | 176.4 |

---

Symmetry code(s): (i)  $-x+1, -y+1, -z+1$ ; (ii)  $-x+1, -y+1, -z$ ; (iii)  $-x+2, -y, -z+1$ ; (iv)  $-x+2, -y+1, -z+1$ ; (v)  $x, y+1, z$ ; (vi)  $-x+2, -y, -z+2$ ; (vii)  $x-1, y, z$ .

**Table S4**  
**Selected lengths (Å) for CP 2.**

|           |           |          |           |
|-----------|-----------|----------|-----------|
| O19—C23   | 1.206 (7) | O1—C1    | 1.239 (7) |
| O19—C23A  | 1.212 (7) | O7—C7    | 1.250 (7) |
| O19—Pr2   | 2.419 (5) | O12—C13  | 1.251 (7) |
| N2—C23    | 1.357 (7) | O17—H17A | 0.8746    |
| N2—C24    | 1.462 (7) | O17—H17B | 0.8755    |
| N2—C25    | 1.460 (7) | O13—C14  | 1.357 (7) |
| C23—H23   | 0.9300    | O13—C17  | 1.368 (7) |
| C24—H24A  | 0.9600    | O9—C12   | 1.264 (8) |
| C24—H24B  | 0.9600    | O15—C18  | 1.240 (7) |
| C24—H24C  | 0.9600    | O8—C8    | 1.376 (8) |
| C25—H25A  | 0.9600    | O8—C11   | 1.370 (8) |
| C25—H25B  | 0.9600    | O14—C18  | 1.260 (8) |
| C25—H25C  | 0.9600    | O16—H16A | 0.86 (2)  |
| N2A—C24A  | 1.464 (7) | O16—H16B | 0.85 (2)  |
| N2A—C25A  | 1.462 (7) | O18—H18A | 0.8567    |
| N2A—C23A  | 1.360 (7) | O18—H18B | 0.8563    |
| C24A—H24D | 0.9600    | O2—C1    | 1.235 (7) |
| C24A—H24E | 0.9600    | C13—C14  | 1.488 (8) |

|                        |            |          |            |
|------------------------|------------|----------|------------|
| C24A—H24F              | 0.9600     | C7—C8    | 1.474 (9)  |
| C25A—H25D              | 0.9600     | C6—C5    | 1.480 (8)  |
| C25A—H25E              | 0.9600     | C1—C2    | 1.479 (8)  |
| C25A—H25F              | 0.9600     | O22—H22A | 0.8491     |
| C23A—H23A              | 0.9300     | O22—H22B | 0.8503     |
| O23—H23B               | 0.8497     | C18—C17  | 1.478 (8)  |
| O23—H23C               | 0.8500     | C8—C9    | 1.338 (10) |
| Pr1—Pr1 <sup>i</sup>   | 4.0436 (6) | C12—C11  | 1.465 (9)  |
| Pr1—O6 <sup>i</sup>    | 2.658 (5)  | C14—C15  | 1.337 (9)  |
| Pr1—O6                 | 2.403 (4)  | C4—H4    | 0.9300     |
| Pr1—O4 <sup>ii</sup>   | 2.423 (4)  | C4—C5    | 1.353 (9)  |
| Pr1—O5 <sup>iii</sup>  | 2.404 (4)  | C4—C3    | 1.421 (9)  |
| Pr1—O1                 | 2.362 (4)  | C2—C3    | 1.343 (9)  |
| Pr1—O7 <sup>i</sup>    | 2.529 (5)  | C15—H15  | 0.9300     |
| Pr1—O15 <sup>iii</sup> | 2.643 (5)  | C15—C16  | 1.411 (9)  |
| Pr1—O14 <sup>iii</sup> | 2.488 (4)  | C17—C16  | 1.345 (9)  |
| Pr1—O16                | 2.427 (5)  | C3—H3    | 0.9300     |
| Pr1—C7 <sup>i</sup>    | 2.959 (6)  | C16—H16  | 0.9300     |
| Pr1—C18 <sup>iii</sup> | 2.921 (6)  | C10—H10  | 0.9300     |
| Pr2—O11 <sup>iv</sup>  | 2.849 (5)  | C10—C9   | 1.418 (10) |

|                       |           |          |            |
|-----------------------|-----------|----------|------------|
| Pr2—O11               | 2.370 (4) | C10—C11  | 1.352 (10) |
| Pr2—O10 <sup>v</sup>  | 2.579 (5) | C9—H9    | 0.9300     |
| Pr2—O12 <sup>iv</sup> | 2.526 (5) | O20—C22  | 1.213 (11) |
| Pr2—O17               | 2.463 (5) | N1—C22   | 1.354 (13) |
| Pr2—O9 <sup>v</sup>   | 2.490 (5) | N1—C19   | 1.449 (16) |
| Pr2—O18               | 2.415 (5) | N1—C20   | 1.415 (17) |
| Pr2—O2                | 2.257 (5) | C22—H22  | 0.9300     |
| Pr2—C13 <sup>iv</sup> | 3.049 (6) | C19—H19A | 0.9600     |
| Pr2—C12 <sup>v</sup>  | 2.889 (7) | C19—H19B | 0.9600     |
| O11—C13               | 1.260 (7) | C19—H19C | 0.9600     |
| O6—C7                 | 1.268 (7) | C20—H20A | 0.9600     |
| O4—C6                 | 1.260 (7) | C20—H20B | 0.9600     |
| O10—C12               | 1.252 (8) | C20—H20C | 0.9600     |
| O5—C6                 | 1.250 (7) | O21—H21A | 0.8501     |
| O3—C2                 | 1.364 (7) | O21—H21B | 0.8501     |
| O3—C5                 | 1.363 (7) |          |            |

Symmetry code(s): (i)  $-x, -y+1, -z+1$ ; (ii)  $-x+1, -y+1, -z+1$ ; (iii)  $x-1, y, z$ ; (iv)  $-x+1, -y+1, -z+2$ ; (v)  $x+1/2, -y+1/2, z+1/2$ .

**Table S5**  
**Selected Bond angles(°) of CP 2.**

|               |            |                                        |             |
|---------------|------------|----------------------------------------|-------------|
| C23—O19—Pr2   | 163.7 (9)  | O9 <sup>v</sup> —Pr2—O10 <sup>v</sup>  | 51.42 (14)  |
| C23A—O19—Pr2  | 135.1 (10) | O9 <sup>v</sup> —Pr2—O12 <sup>iv</sup> | 83.65 (17)  |
| C23—N2—C24    | 117.5 (15) | O9 <sup>v</sup> —Pr2—C13 <sup>iv</sup> | 78.00 (17)  |
| C23—N2—C25    | 119.1 (18) | O9 <sup>v</sup> —Pr2—C12 <sup>v</sup>  | 25.85 (17)  |
| C25—N2—C24    | 119.6 (19) | O18—Pr2—O19                            | 72.7 (2)    |
| O19—C23—N2    | 121.9 (13) | O18—Pr2—O11 <sup>iv</sup>              | 144.46 (17) |
| O19—C23—H23   | 119.1      | O18—Pr2—O10 <sup>v</sup>               | 70.35 (17)  |
| N2—C23—H23    | 119.1      | O18—Pr2—O12 <sup>iv</sup>              | 138.76 (17) |
| N2—C24—H24A   | 109.5      | O18—Pr2—O17                            | 142.90 (18) |
| N2—C24—H24B   | 109.5      | O18—Pr2—O9 <sup>v</sup>                | 76.40 (18)  |
| N2—C24—H24C   | 109.5      | O18—Pr2—C13 <sup>iv</sup>              | 151.29 (18) |
| H24A—C24—H24B | 109.5      | O18—Pr2—C12 <sup>v</sup>               | 73.09 (19)  |
| H24A—C24—H24C | 109.5      | O2—Pr2—O19                             | 79.6 (2)    |
| H24B—C24—H24C | 109.5      | O2—Pr2—O11 <sup>iv</sup>               | 122.32 (16) |
| N2—C25—H25A   | 109.5      | O2—Pr2—O11                             | 154.2 (2)   |
| N2—C25—H25B   | 109.5      | O2—Pr2—O10 <sup>v</sup>                | 78.4 (2)    |
| N2—C25—H25C   | 109.5      | O2—Pr2—O12 <sup>iv</sup>               | 77.98 (18)  |
| H25A—C25—H25B | 109.5      | O2—Pr2—O17                             | 81.08 (19)  |
| H25A—C25—H25C | 109.5      | O2—Pr2—O9 <sup>v</sup>                 | 129.9 (2)   |
| H25B—C25—H25C | 109.5      | O2—Pr2—O18                             | 87.65 (19)  |



|                         |            |                                         |             |
|-------------------------|------------|-----------------------------------------|-------------|
| C25A—N2A—C24A           | 116 (2)    | O2—Pr2—C13 <sup>iv</sup>                | 99.02 (18)  |
| C23A—N2A—C24A           | 123 (2)    | O2—Pr2—C12 <sup>v</sup>                 | 104.1 (2)   |
| C23A—N2A—C25A           | 120 (2)    | C12 <sup>v</sup> —Pr2—C13 <sup>iv</sup> | 78.20 (18)  |
| N2A—C24A—H24D           | 109.5      | Pr2—O11—Pr2 <sup>iv</sup>               | 113.32 (16) |
| N2A—C24A—H24E           | 109.5      | C13—O11—Pr2                             | 158.3 (4)   |
| N2A—C24A—H24F           | 109.5      | C13—O11—Pr2 <sup>iv</sup>               | 86.7 (4)    |
| H24D—C24A—H24E          | 109.5      | Pr1—O6—Pr1 <sup>i</sup>                 | 105.95 (16) |
| H24D—C24A—H24F          | 109.5      | C7—O6—Pr1                               | 156.2 (4)   |
| H24E—C24A—H24F          | 109.5      | C7—O6—Pr1 <sup>i</sup>                  | 90.7 (4)    |
| N2A—C25A—H25D           | 109.5      | C6—O4—Pr1 <sup>ii</sup>                 | 134.4 (4)   |
| N2A—C25A—H25E           | 109.5      | C12—O10—Pr2 <sup>vi</sup>               | 91.1 (4)    |
| N2A—C25A—H25F           | 109.5      | C6—O5—Pr1 <sup>vii</sup>                | 138.2 (4)   |
| H25D—C25A—H25E          | 109.5      | C5—O3—C2                                | 106.4 (5)   |
| H25D—C25A—H25F          | 109.5      | C1—O1—Pr1                               | 147.2 (4)   |
| H25E—C25A—H25F          | 109.5      | C7—O7—Pr1 <sup>i</sup>                  | 97.2 (4)    |
| O19—C23A—N2A            | 125.7 (16) | C13—O12—Pr2 <sup>iv</sup>               | 102.3 (4)   |
| O19—C23A—H23A           | 117.2      | Pr2—O17—H17A                            | 110.8       |
| N2A—C23A—H23A           | 117.2      | Pr2—O17—H17B                            | 110.4       |
| H23B—O23—H23C           | 109.5      | H17A—O17—H17B                           | 108.2       |
| O6—Pr1—Pr1 <sup>i</sup> | 39.20 (11) | C14—O13—C17                             | 106.4 (5)   |

|                                          |             |                            |           |
|------------------------------------------|-------------|----------------------------|-----------|
| O6 <sup>i</sup> —Pr1—Pr1 <sup>i</sup>    | 34.85 (9)   | C12—O9—Pr2 <sup>vi</sup>   | 95.0 (4)  |
| O6—Pr1—O6 <sup>i</sup>                   | 74.05 (16)  | C18—O15—Pr1 <sup>vii</sup> | 90.1 (4)  |
| O6—Pr1—O4 <sup>ii</sup>                  | 76.74 (15)  | C11—O8—C8                  | 106.9 (5) |
| O6—Pr1—O5 <sup>iii</sup>                 | 75.78 (15)  | C18—O14—Pr1 <sup>vii</sup> | 97.0 (4)  |
| O6—Pr1—O7 <sup>i</sup>                   | 122.41 (15) | Pr1—O16—H16A               | 125 (5)   |
| O6—Pr1—O15 <sup>iii</sup>                | 157.88 (15) | Pr1—O16—H16B               | 131 (5)   |
| O6—Pr1—O14 <sup>iii</sup>                | 146.47 (15) | H16A—O16—H16B              | 104 (4)   |
| O6—Pr1—O16                               | 86.08 (18)  | Pr2—O18—H18A               | 109.8     |
| O6 <sup>i</sup> —Pr1—C7 <sup>i</sup>     | 25.37 (15)  | Pr2—O18—H18B               | 109.5     |
| O6—Pr1—C7 <sup>i</sup>                   | 98.36 (16)  | H18A—O18—H18B              | 109.1     |
| O6 <sup>i</sup> —Pr1—C18 <sup>iii</sup>  | 115.38 (16) | C1—O2—Pr2                  | 176.7 (5) |
| O6—Pr1—C18 <sup>iii</sup>                | 166.47 (17) | O11—C13—Pr2 <sup>iv</sup>  | 68.9 (3)  |
| O4 <sup>ii</sup> —Pr1—Pr1 <sup>i</sup>   | 67.79 (10)  | O11—C13—C14                | 119.8 (5) |
| O4 <sup>ii</sup> —Pr1—O6 <sup>i</sup>    | 68.43 (14)  | O12—C13—Pr2 <sup>iv</sup>  | 54.0 (3)  |
| O4 <sup>ii</sup> —Pr1—O7 <sup>i</sup>    | 71.23 (16)  | O12—C13—O11                | 122.0 (6) |
| O4 <sup>ii</sup> —Pr1—O15 <sup>iii</sup> | 93.73 (15)  | O12—C13—C14                | 118.2 (6) |
| O4 <sup>ii</sup> —Pr1—O14 <sup>iii</sup> | 134.88 (16) | C14—C13—Pr2 <sup>iv</sup>  | 165.7 (4) |
| O4 <sup>ii</sup> —Pr1—O16                | 141.22 (17) | O6—C7—Pr1 <sup>i</sup>     | 63.9 (3)  |
| O4 <sup>ii</sup> —Pr1—C7 <sup>i</sup>    | 66.80 (16)  | O6—C7—C8                   | 118.3 (6) |
| O4 <sup>ii</sup> —Pr1—C18 <sup>iii</sup> | 115.23 (16) | O7—C7—Pr1 <sup>i</sup>     | 58.0 (3)  |

|                                           |             |                            |           |
|-------------------------------------------|-------------|----------------------------|-----------|
| O5 <sup>iii</sup> —Pr1—Pr1 <sup>i</sup>   | 67.39 (11)  | O7—C7—O6                   | 121.8 (6) |
| O5 <sup>iii</sup> —Pr1—O6 <sup>i</sup>    | 68.73 (15)  | O7—C7—C8                   | 119.8 (6) |
| O5 <sup>iii</sup> —Pr1—O4 <sup>ii</sup>   | 133.83 (15) | C8—C7—Pr1 <sup>i</sup>     | 177.0 (4) |
| O5 <sup>iii</sup> —Pr1—O7 <sup>i</sup>    | 93.70 (17)  | O4—C6—C5                   | 114.7 (5) |
| O5 <sup>iii</sup> —Pr1—O15 <sup>iii</sup> | 123.19 (14) | O5—C6—O4                   | 127.2 (6) |
| O5 <sup>iii</sup> —Pr1—O14 <sup>iii</sup> | 72.74 (15)  | O5—C6—C5                   | 118.1 (5) |
| O5 <sup>iii</sup> —Pr1—O16                | 72.07 (17)  | O1—C1—C2                   | 118.0 (5) |
| O5 <sup>iii</sup> —Pr1—C7 <sup>i</sup>    | 81.41 (17)  | O2—C1—O1                   | 125.3 (6) |
| O5 <sup>iii</sup> —Pr1—C18 <sup>iii</sup> | 98.08 (17)  | O2—C1—C2                   | 116.6 (5) |
| O1—Pr1—Pr1 <sup>i</sup>                   | 111.31 (11) | H22A—O22—H22B              | 109.5     |
| O1—Pr1—O6                                 | 78.75 (15)  | O15—C18—Pr1 <sup>vii</sup> | 64.8 (3)  |
| O1—Pr1—O6 <sup>i</sup>                    | 136.83 (14) | O15—C18—O14                | 122.5 (6) |
| O1—Pr1—O4 <sup>ii</sup>                   | 73.15 (16)  | O15—C18—C17                | 120.1 (6) |
| O1—Pr1—O5 <sup>iii</sup>                  | 134.81 (17) | O14—C18—Pr1 <sup>vii</sup> | 57.7 (3)  |
| O1—Pr1—O7 <sup>i</sup>                    | 131.49 (17) | O14—C18—C17                | 117.4 (5) |
| O1—Pr1—O15 <sup>iii</sup>                 | 79.38 (15)  | C17—C18—Pr1 <sup>vii</sup> | 175.1 (4) |
| O1—Pr1—O14 <sup>iii</sup>                 | 116.63 (16) | O8—C8—C7                   | 116.5 (5) |
| O1—Pr1—O16                                | 69.49 (16)  | C9—C8—O8                   | 109.4 (6) |
| O1—Pr1—C7 <sup>i</sup>                    | 139.32 (16) | C9—C8—C7                   | 134.1 (6) |
| O1—Pr1—C18 <sup>iii</sup>                 | 98.17 (16)  | O10—C12—Pr2 <sup>vi</sup>  | 63.2 (4)  |

|                                            |             |                           |           |
|--------------------------------------------|-------------|---------------------------|-----------|
| O7 <sup>i</sup> —Pr1—Pr1 <sup>i</sup>      | 84.10 (10)  | O10—C12—O9                | 122.0 (6) |
| O7 <sup>i</sup> —Pr1—O6 <sup>i</sup>       | 50.13 (14)  | O10—C12—C11               | 119.5 (6) |
| O7 <sup>i</sup> —Pr1—O15 <sup>iii</sup>    | 71.28 (16)  | O9—C12—Pr2 <sup>vi</sup>  | 59.2 (3)  |
| O7 <sup>i</sup> —Pr1—C7 <sup>i</sup>       | 24.78 (15)  | O9—C12—C11                | 118.5 (6) |
| O7 <sup>i</sup> —Pr1—C18 <sup>iii</sup>    | 69.47 (16)  | C11—C12—Pr2 <sup>vi</sup> | 172.6 (5) |
| O15 <sup>iii</sup> —Pr1—Pr1 <sup>i</sup>   | 153.23 (12) | O13—C14—C13               | 116.7 (5) |
| O15 <sup>iii</sup> —Pr1—O6 <sup>i</sup>    | 121.38 (15) | C15—C14—O13               | 110.6 (5) |
| O15 <sup>iii</sup> —Pr1—C7 <sup>i</sup>    | 96.00 (17)  | C15—C14—C13               | 132.5 (6) |
| O15 <sup>iii</sup> —Pr1—C18 <sup>iii</sup> | 25.11 (15)  | C5—C4—H4                  | 126.9     |
| O14 <sup>iii</sup> —Pr1—Pr1 <sup>i</sup>   | 131.19 (11) | C5—C4—C3                  | 106.1 (6) |
| O14 <sup>iii</sup> —Pr1—O6 <sup>i</sup>    | 104.37 (15) | C3—C4—H4                  | 126.9     |
| O14 <sup>iii</sup> —Pr1—O7 <sup>i</sup>    | 71.36 (16)  | O3—C2—C1                  | 117.2 (5) |
| O14 <sup>iii</sup> —Pr1—O15 <sup>iii</sup> | 50.46 (14)  | C3—C2—O3                  | 110.4 (5) |
| O14 <sup>iii</sup> —Pr1—C7 <sup>i</sup>    | 88.17 (17)  | C3—C2—C1                  | 132.1 (6) |
| O14 <sup>iii</sup> —Pr1—C18 <sup>iii</sup> | 25.35 (16)  | C14—C15—H15               | 126.7     |
| O16—Pr1—Pr1 <sup>i</sup>                   | 117.20 (14) | C14—C15—C16               | 106.5 (6) |
| O16—Pr1—O6 <sup>i</sup>                    | 139.23 (16) | C16—C15—H15               | 126.7     |
| O16—Pr1—O7 <sup>i</sup>                    | 144.73 (18) | O13—C17—C18               | 114.1 (5) |
| O16—Pr1—O15 <sup>iii</sup>                 | 89.41 (18)  | C16—C17—O13               | 109.6 (5) |
| O16—Pr1—O14 <sup>iii</sup>                 | 73.59 (18)  | C16—C17—C18               | 136.3 (6) |

|                                          |             |             |            |
|------------------------------------------|-------------|-------------|------------|
| O16—Pr1—C7 <sup>i</sup>                  | 151.19 (16) | O3—C5—C6    | 118.0 (5)  |
| O16—Pr1—C18 <sup>iii</sup>               | 80.53 (19)  | C4—C5—O3    | 110.3 (5)  |
| C7 <sup>i</sup> —Pr1—Pr1 <sup>i</sup>    | 59.50 (12)  | C4—C5—C6    | 131.5 (6)  |
| C18 <sup>iii</sup> —Pr1—Pr1 <sup>i</sup> | 149.27 (12) | C4—C3—H3    | 126.6      |
| C18 <sup>iii</sup> —Pr1—C7 <sup>i</sup>  | 92.52 (17)  | C2—C3—C4    | 106.7 (6)  |
| O19—Pr2—O11 <sup>iv</sup>                | 127.03 (19) | C2—C3—H3    | 126.6      |
| O19—Pr2—O10 <sup>v</sup>                 | 137.41 (19) | C15—C16—H16 | 126.6      |
| O19—Pr2—O12 <sup>iv</sup>                | 139.54 (19) | C17—C16—C15 | 106.9 (6)  |
| O19—Pr2—O17                              | 70.55 (19)  | C17—C16—H16 | 126.6      |
| O19—Pr2—O9 <sup>v</sup>                  | 135.85 (18) | C9—C10—H10  | 126.8      |
| O19—Pr2—C13 <sup>iv</sup>                | 135.90 (19) | C11—C10—H10 | 126.8      |
| O19—Pr2—C12 <sup>v</sup>                 | 145.4 (2)   | C11—C10—C9  | 106.4 (7)  |
| O11—Pr2—O19                              | 76.7 (2)    | C8—C9—C10   | 107.7 (7)  |
| O11—Pr2—O11 <sup>iv</sup>                | 66.68 (16)  | C8—C9—H9    | 126.2      |
| O11—Pr2—O10 <sup>v</sup>                 | 126.65 (15) | C10—C9—H9   | 126.2      |
| O11—Pr2—O12 <sup>iv</sup>                | 114.40 (15) | O8—C11—C12  | 117.5 (6)  |
| O11—Pr2—O17                              | 81.33 (16)  | C10—C11—O8  | 109.7 (6)  |
| O11—Pr2—O9 <sup>v</sup>                  | 75.46 (15)  | C10—C11—C12 | 132.7 (7)  |
| O11—Pr2—O18                              | 95.14 (17)  | C22—N1—C19  | 117.9 (12) |
| O11 <sup>iv</sup> —Pr2—C13 <sup>iv</sup> | 24.38 (14)  | C22—N1—C20  | 120.3 (12) |

|                                          |             |               |            |
|------------------------------------------|-------------|---------------|------------|
| O11—Pr2—C13 <sup>iv</sup>                | 90.81 (16)  | C20—N1—C19    | 121.8 (13) |
| O11—Pr2—C12 <sup>v</sup>                 | 101.30 (18) | O20—C22—N1    | 125.0 (10) |
| O11 <sup>iv</sup> —Pr2—C12 <sup>v</sup>  | 80.66 (16)  | O20—C22—H22   | 117.5      |
| O10 <sup>v</sup> —Pr2—O11 <sup>iv</sup>  | 95.52 (14)  | N1—C22—H22    | 117.5      |
| O10 <sup>v</sup> —Pr2—C13 <sup>iv</sup>  | 83.60 (16)  | N1—C19—H19A   | 109.5      |
| O10 <sup>v</sup> —Pr2—C12 <sup>v</sup>   | 25.67 (16)  | N1—C19—H19B   | 109.5      |
| O12 <sup>iv</sup> —Pr2—O11 <sup>iv</sup> | 47.76 (13)  | N1—C19—H19C   | 109.5      |
| O12 <sup>iv</sup> —Pr2—O10 <sup>v</sup>  | 68.98 (16)  | H19A—C19—H19B | 109.5      |
| O12 <sup>iv</sup> —Pr2—C13 <sup>iv</sup> | 23.63 (15)  | H19A—C19—H19C | 109.5      |
| O12 <sup>iv</sup> —Pr2—C12 <sup>v</sup>  | 73.34 (18)  | H19B—C19—H19C | 109.5      |
| O17—Pr2—O11 <sup>iv</sup>                | 67.27 (15)  | N1—C20—H20A   | 109.5      |
| O17—Pr2—O10 <sup>v</sup>                 | 139.66 (16) | N1—C20—H20B   | 109.5      |
| O17—Pr2—O12 <sup>iv</sup>                | 72.98 (17)  | N1—C20—H20C   | 109.5      |
| O17—Pr2—O9 <sup>v</sup>                  | 136.35 (16) | H20A—C20—H20B | 109.5      |
| O17—Pr2—C13 <sup>iv</sup>                | 65.77 (17)  | H20A—C20—H20C | 109.5      |
| O17—Pr2—C12 <sup>v</sup>                 | 143.95 (18) | H20B—C20—H20C | 109.5      |
| O9 <sup>v</sup> —Pr2—O11 <sup>iv</sup>   | 69.68 (15)  | H21A—O21—H21B | 109.5      |

Symmetry code(s): (i)  $-x, -y+1, -z+1$ ; (ii)  $-x+1, -y+1, -z+1$ ; (iii)  $x-1, y, z$ ; (iv)  $-x+1, -y+1, -z+2$ ; (v)  $x+1/2, -y+1/2, z+1/2$ ; (vi)  $x-1/2, -y+1/2, z-1/2$ ; (vii)  $x+1, y, z$ .

**Table S6**  
**Number and positions of Hydrogen bonds [ $\text{\AA}$  and  $^\circ$ ] in CP 2.**

| $D-H\cdots A$                                       | $D-H$ (Å) | $H\cdots A$ (Å) | $D\cdots A$ (Å) | $D-H\cdots A$ (°) |
|-----------------------------------------------------|-----------|-----------------|-----------------|-------------------|
| C25 <sup>a</sup> H25A <sup>a</sup> O23 <sup>1</sup> | 0.96      | 2.02            | 2.68            | 124.4             |
| C23A <sup>b</sup> H23A <sup>b</sup> O17             | 0.93      | 2.25            | 2.862(19)       | 122.6             |
| O17 H17A O9 <sup>1</sup>                            | 0.87      | 1.91            | 2.720(6)        | 154.4             |
| O17 H17B O15 <sup>2</sup>                           | 0.88      | 1.89            | 2.720(6)        | 158.7             |
| O16 H16A O2 <sup>2</sup>                            | 0.86(2)   | 1.88(2)         | 2.726(9)        | 172(9)            |
| O16 H16B O20 <sup>2</sup>                           | 0.85(2)   | 1.94(2)         | 2.783(8)        | 173(8)            |
| O18 H18B O14                                        | 0.86      | 2.05            | 2.797(7)        | 144.8             |
| O22 H22A O2 <sup>1</sup>                            | 0.85      | 2.02            | 2.851(15)       | 165.8             |
| O22 H22B O12 <sup>3</sup>                           | 0.85      | 2.02            | 2.827(8)        | 159.3             |
| O21 H21A O2 <sup>3</sup>                            | 0.85      | 1.89            | 2.67(4)         | 152.3             |

<sup>1</sup>1/2-X,1/2+Y,3/2-Z; <sup>2</sup>-1+X,+Y,+Z; <sup>3</sup>1-X,1-Y,2-Z



**Table S7**  
**Selected Bond lengths (Å) of CP 3.**

|                        |            |          |            |
|------------------------|------------|----------|------------|
| Eu1—Eu1 <sup>i</sup>   | 4.3672 (4) | C18—C17  | 1.474 (7)  |
| Eu1—O6 <sup>i</sup>    | 2.847 (3)  | O21—H21D | 0.8507     |
| Eu1—O6                 | 2.370 (3)  | O21—H21E | 0.8491     |
| Eu1—O15 <sup>ii</sup>  | 2.494 (3)  | C2—C1    | 1.477 (5)  |
| Eu1—O7 <sup>i</sup>    | 2.529 (3)  | C2—C3    | 1.351 (6)  |
| Eu1—O17                | 2.459 (3)  | C14—C15  | 1.335 (7)  |
| Eu1—O14 <sup>ii</sup>  | 2.581 (3)  | C12—C11  | 1.479 (5)  |
| Eu1—O16                | 2.418 (3)  | C8—C9    | 1.333 (6)  |
| Eu1—H16B               | 2.8157     | C5—C4    | 1.348 (6)  |
| Eu1—O1                 | 2.259 (3)  | C4—H4    | 0.9300     |
| Eu1—O19                | 2.418 (4)  | C4—C3    | 1.411 (6)  |
| Eu1—C7 <sup>i</sup>    | 3.046 (4)  | C17—C16  | 1.353 (7)  |
| Eu1—C18 <sup>ii</sup>  | 2.883 (5)  | C10—H10  | 0.9300     |
| Eu2—Eu2 <sup>iii</sup> | 4.0473 (4) | C10—C9   | 1.419 (6)  |
| Eu2—O11                | 2.666 (3)  | C10—C11  | 1.339 (6)  |
| Eu2—O11 <sup>iii</sup> | 2.407 (3)  | C3—H3    | 0.9300     |
| Eu2—O4 <sup>iv</sup>   | 2.416 (3)  | C9—H9    | 0.9300     |
| Eu2—O5 <sup>v</sup>    | 2.400 (3)  | N1—C22A  | 1.320 (16) |

|                      |           |          |            |
|----------------------|-----------|----------|------------|
| Eu2—O2               | 2.357 (3) | N1—C23   | 1.36 (2)   |
| Eu2—O12              | 2.529 (3) | N1—C24   | 1.60 (2)   |
| Eu2—O9 <sup>v</sup>  | 2.479 (3) | N1—C22   | 1.348 (11) |
| Eu2—O10 <sup>v</sup> | 2.649 (3) | N1—C23A  | 1.350 (17) |
| Eu2—O18              | 2.435 (4) | N1—C24A  | 1.466 (12) |
| Eu2—C13              | 2.955 (4) | C15—H15  | 0.9300     |
| Eu2—C12 <sup>v</sup> | 2.923 (4) | C15—C16  | 1.417 (7)  |
| O11—C13              | 1.264 (5) | C16—H16  | 0.9300     |
| O6—C7                | 1.258 (5) | C19—H19  | 0.9300     |
| O4—C6                | 1.253 (5) | C19—N2   | 1.320 (9)  |
| O5—C6                | 1.255 (5) | N2—C21   | 1.442 (11) |
| O2—C1                | 1.243 (5) | N2—C20   | 1.431 (13) |
| O13—C14              | 1.375 (5) | O22—H22B | 0.8499     |
| O13—C17              | 1.365 (6) | O22—H22C | 0.8503     |
| O3—C2                | 1.362 (5) | C21—H21A | 0.9600     |
| O3—C5                | 1.368 (5) | C21—H21B | 0.9600     |
| O12—C13              | 1.244 (5) | C21—H21C | 0.9600     |
| O15—C18              | 1.260 (6) | C20—H20A | 0.9600     |
| O7—C7                | 1.253 (5) | C20—H20B | 0.9600     |
| O17—H17A             | 0.8509    | C20—H20C | 0.9600     |

|          |            |           |        |
|----------|------------|-----------|--------|
| O17—H17B | 0.8495     | C22A—H22A | 0.9300 |
| O14—C18  | 1.247 (5)  | C23—H23A  | 0.9600 |
| O8—C8    | 1.368 (5)  | C23—H23B  | 0.9600 |
| O8—C11   | 1.374 (5)  | C23—H23C  | 0.9600 |
| O9—C12   | 1.252 (5)  | C24—H24A  | 0.9600 |
| O16—H16A | 0.8523     | C24—H24B  | 0.9600 |
| O16—H16B | 0.8507     | C24—H24C  | 0.9600 |
| O10—C12  | 1.255 (5)  | C22—H22   | 0.9300 |
| O18—H18A | 0.8526     | C23A—H23D | 0.9600 |
| O18—H18B | 0.8518     | C23A—H23E | 0.9600 |
| O1—C1    | 1.235 (5)  | C23A—H23F | 0.9600 |
| C13—C14  | 1.483 (6)  | C24A—H24D | 0.9600 |
| C6—C5    | 1.484 (6)  | C24A—H24E | 0.9600 |
| O19—C22A | 1.228 (19) | C24A—H24F | 0.9600 |
| O19—C22  | 1.195 (9)  | O23—H23G  | 0.8498 |
| C7—C8    | 1.484 (6)  | O23—H23H  | 0.8499 |
| O20—C19  | 1.206 (8)  |           |        |

---

Symmetry code(s): (i)  $-x+1, -y+1, -z+1$ ; (ii)  $-x+3/2, y+1/2, -z+3/2$ ; (iii)  $-x+2, -y+1, -z+2$ ; (iv)  $-x+1, -y+1, -z+2$ ; (v)  $x+1, y, z$ .

**Table S8**  
**Selected bond angles (°) for CP 3.**

|                                         |             |                            |           |
|-----------------------------------------|-------------|----------------------------|-----------|
| Eu1 <sup>i</sup> —Eu1—H16B              | 122.2       | C7—O6—Eu1                  | 158.3 (3) |
| O6 <sup>i</sup> —Eu1—Eu1 <sup>i</sup>   | 29.89 (6)   | C6—O4—Eu2 <sup>iv</sup>    | 134.7 (3) |
| O6—Eu1—Eu1 <sup>i</sup>                 | 36.76 (7)   | C6—O5—Eu2 <sup>vi</sup>    | 138.0 (3) |
| O6—Eu1—O6 <sup>i</sup>                  | 66.65 (11)  | C1—O2—Eu2                  | 147.1 (3) |
| O6—Eu1—O15 <sup>ii</sup>                | 75.46 (11)  | C17—O13—C14                | 106.4 (3) |
| O6—Eu1—O7 <sup>i</sup>                  | 114.46 (10) | C2—O3—C5                   | 106.2 (3) |
| O6—Eu1—O17                              | 81.57 (11)  | C13—O12—Eu2                | 97.2 (3)  |
| O6—Eu1—O14 <sup>ii</sup>                | 126.56 (11) | C18—O15—Eu1 <sup>vii</sup> | 94.6 (3)  |
| O6—Eu1—O16                              | 94.63 (12)  | C7—O7—Eu1 <sup>i</sup>     | 101.9 (3) |
| O6—Eu1—H16B                             | 87.3        | Eu1—O17—H17A               | 109.5     |
| O6 <sup>i</sup> —Eu1—H16B               | 149.0       | Eu1—O17—H17B               | 109.3     |
| O6—Eu1—O19                              | 76.74 (14)  | H17A—O17—H17B              | 109.6     |
| O6 <sup>i</sup> —Eu1—C7 <sup>i</sup>    | 24.35 (10)  | C18—O14—Eu1 <sup>vii</sup> | 90.8 (3)  |
| O6—Eu1—C7 <sup>i</sup>                  | 90.77 (11)  | C8—O8—C11                  | 106.2 (3) |
| O6—Eu1—C18 <sup>ii</sup>                | 101.27 (12) | C12—O9—Eu2 <sup>vi</sup>   | 97.8 (2)  |
| O6 <sup>i</sup> —Eu1—C18 <sup>ii</sup>  | 80.65 (11)  | Eu1—O16—H16A               | 109.7     |
| O15 <sup>ii</sup> —Eu1—Eu1 <sup>i</sup> | 68.71 (7)   | Eu1—O16—H16B               | 109.2     |

|                                          |             |                           |           |
|------------------------------------------|-------------|---------------------------|-----------|
| O15 <sup>ii</sup> —Eu1—O6 <sup>i</sup>   | 69.64 (10)  | H16A—O16—H16B             | 109.3     |
| O15 <sup>ii</sup> —Eu1—O7 <sup>i</sup>   | 83.60 (12)  | C12—O10—Eu2 <sup>vi</sup> | 89.6 (3)  |
| O15 <sup>ii</sup> —Eu1—O14 <sup>ii</sup> | 51.35 (10)  | Eu2—O18—H18A              | 109.5     |
| O15 <sup>ii</sup> —Eu1—H16B              | 88.4        | Eu2—O18—H18B              | 109.2     |
| O15 <sup>ii</sup> —Eu1—C7 <sup>i</sup>   | 77.84 (12)  | H18A—O18—H18B             | 109.3     |
| O15 <sup>ii</sup> —Eu1—C18 <sup>ii</sup> | 25.82 (12)  | C1—O1—Eu1                 | 177.8 (3) |
| O7 <sup>i</sup> —Eu1—Eu1 <sup>i</sup>    | 77.72 (7)   | O11—C13—Eu2               | 64.5 (2)  |
| O7 <sup>i</sup> —Eu1—O6 <sup>i</sup>     | 47.85 (9)   | O11—C13—C14               | 117.7 (4) |
| O7 <sup>i</sup> —Eu1—O14 <sup>ii</sup>   | 68.98 (11)  | O12—C13—Eu2               | 58.1 (2)  |
| O7 <sup>i</sup> —Eu1—H16B                | 153.8       | O12—C13—O11               | 122.5 (4) |
| O7 <sup>i</sup> —Eu1—C7 <sup>i</sup>     | 23.73 (11)  | O12—C13—C14               | 119.8 (4) |
| O7 <sup>i</sup> —Eu1—C18 <sup>ii</sup>   | 73.29 (13)  | C14—C13—Eu2               | 177.3 (3) |
| O17—Eu1—Eu1 <sup>i</sup>                 | 70.58 (7)   | O4—C6—O5                  | 127.1 (4) |
| O17—Eu1—O6 <sup>i</sup>                  | 67.17 (10)  | O4—C6—C5                  | 115.0 (4) |
| O17—Eu1—O15 <sup>ii</sup>                | 136.26 (11) | O5—C6—C5                  | 117.9 (4) |
| O17—Eu1—O7 <sup>i</sup>                  | 72.76 (12)  | C22A—O19—Eu1              | 136.4 (7) |
| O17—Eu1—O14 <sup>ii</sup>                | 139.45 (11) | C22—O19—Eu1               | 165.0 (6) |
| O17—Eu1—H16B                             | 127.4       | O6—C7—Eu1 <sup>i</sup>    | 68.9 (2)  |
| O17—Eu1—C7 <sup>i</sup>                  | 65.66 (12)  | O6—C7—C8                  | 120.4 (4) |
| O17—Eu1—C18 <sup>ii</sup>                | 143.70 (12) | O7—C7—Eu1 <sup>i</sup>    | 54.3 (2)  |

|                                          |             |                            |           |
|------------------------------------------|-------------|----------------------------|-----------|
| O14 <sup>ii</sup> —Eu1—Eu1 <sup>i</sup>  | 112.73 (7)  | O7—C7—O6                   | 122.3 (4) |
| O14 <sup>ii</sup> —Eu1—O6 <sup>i</sup>   | 95.55 (10)  | O7—C7—C8                   | 117.2 (4) |
| O14 <sup>ii</sup> —Eu1—H16B              | 86.6        | C8—C7—Eu1 <sup>i</sup>     | 164.8 (3) |
| O14 <sup>ii</sup> —Eu1—C7 <sup>i</sup>   | 83.57 (11)  | O15—C18—Eu1 <sup>vii</sup> | 59.6 (2)  |
| O14 <sup>ii</sup> —Eu1—C18 <sup>ii</sup> | 25.63 (11)  | O15—C18—C17                | 117.7 (4) |
| O16—Eu1—Eu1 <sup>i</sup>                 | 124.77 (9)  | O14—C18—Eu1 <sup>vii</sup> | 63.5 (2)  |
| O16—Eu1—O6 <sup>i</sup>                  | 143.86 (11) | O14—C18—O15                | 122.8 (4) |
| O16—Eu1—O15 <sup>ii</sup>                | 75.95 (12)  | O14—C18—C17                | 119.5 (4) |
| O16—Eu1—O7 <sup>i</sup>                  | 138.80 (12) | C17—C18—Eu1 <sup>vii</sup> | 172.1 (3) |
| O16—Eu1—O17                              | 143.41 (12) | H21D—O21—H21E              | 109.4     |
| O16—Eu1—O14 <sup>ii</sup>                | 70.29 (11)  | O3—C2—C1                   | 117.3 (3) |
| O16—Eu1—H16B                             | 16.6        | C3—C2—O3                   | 110.2 (4) |
| O16—Eu1—C7 <sup>i</sup>                  | 150.92 (12) | C3—C2—C1                   | 132.3 (4) |
| O16—Eu1—C18 <sup>ii</sup>                | 72.84 (12)  | O13—C14—C13                | 115.9 (4) |
| O1—Eu1—Eu1 <sup>i</sup>                  | 146.55 (9)  | C15—C14—O13                | 110.0 (4) |
| O1—Eu1—O6 <sup>i</sup>                   | 122.09 (11) | C15—C14—C13                | 134.1 (4) |
| O1—Eu1—O6                                | 154.05 (15) | O9—C12—Eu2 <sup>vi</sup>   | 57.1 (2)  |
| O1—Eu1—O15 <sup>ii</sup>                 | 130.05 (14) | O9—C12—O10                 | 122.1 (4) |
| O1—Eu1—O7 <sup>i</sup>                   | 77.76 (12)  | O9—C12—C11                 | 118.5 (4) |
| O1—Eu1—O17                               | 80.63 (13)  | O10—C12—Eu2 <sup>vi</sup>  | 64.9 (2)  |

|                                         |             |                           |           |
|-----------------------------------------|-------------|---------------------------|-----------|
| O1—Eu1—O14 <sup>ii</sup>                | 78.70 (14)  | O10—C12—C11               | 119.4 (4) |
| O1—Eu1—O16                              | 88.56 (13)  | C11—C12—Eu2 <sup>vi</sup> | 175.7 (3) |
| O1—Eu1—H16B                             | 88.7        | O8—C8—C7                  | 115.8 (4) |
| O1—Eu1—O19                              | 79.66 (15)  | C9—C8—O8                  | 110.5 (4) |
| O1—Eu1—C7 <sup>i</sup>                  | 98.88 (12)  | C9—C8—C7                  | 133.6 (4) |
| O1—Eu1—C18 <sup>ii</sup>                | 104.27 (15) | O3—C5—C6                  | 117.9 (4) |
| O19—Eu1—Eu1 <sup>i</sup>                | 105.57 (11) | C4—C5—O3                  | 110.3 (4) |
| O19—Eu1—O6 <sup>i</sup>                 | 127.06 (13) | C4—C5—C6                  | 131.6 (4) |
| O19—Eu1—O15 <sup>ii</sup>               | 135.83 (13) | O2—C1—C2                  | 117.9 (4) |
| O19—Eu1—O7 <sup>i</sup>                 | 139.63 (13) | O1—C1—O2                  | 125.1 (4) |
| O19—Eu1—O17                             | 70.86 (13)  | O1—C1—C2                  | 117.0 (4) |
| O19—Eu1—O14 <sup>ii</sup>               | 137.34 (13) | C5—C4—H4                  | 126.7     |
| O19—Eu1—O16                             | 72.85 (13)  | C5—C4—C3                  | 106.5 (4) |
| O19—Eu1—H16B                            | 56.6        | C3—C4—H4                  | 126.7     |
| O19—Eu1—C7 <sup>i</sup>                 | 136.06 (13) | O13—C17—C18               | 117.4 (4) |
| O19—Eu1—C18 <sup>ii</sup>               | 145.33 (13) | C16—C17—O13               | 109.9 (4) |
| C7 <sup>i</sup> —Eu1—Eu1 <sup>i</sup>   | 54.08 (8)   | C16—C17—C18               | 132.7 (5) |
| C7 <sup>i</sup> —Eu1—H16B               | 166.2       | C9—C10—H10                | 126.4     |
| C18 <sup>ii</sup> —Eu1—Eu1 <sup>i</sup> | 90.01 (9)   | C11—C10—H10               | 126.4     |
| C18 <sup>ii</sup> —Eu1—H16B             | 88.8        | C11—C10—C9                | 107.2 (4) |



|                                            |             |              |            |
|--------------------------------------------|-------------|--------------|------------|
| C18 <sup>ii</sup> —Eu1—C7 <sup>i</sup>     | 78.08 (12)  | C2—C3—C4     | 106.7 (4)  |
| O11—Eu2—Eu2 <sup>iii</sup>                 | 34.93 (6)   | C2—C3—H3     | 126.6      |
| O11 <sup>iii</sup> —Eu2—Eu2 <sup>iii</sup> | 39.35 (8)   | C4—C3—H3     | 126.6      |
| O11 <sup>iii</sup> —Eu2—O11                | 74.28 (11)  | C8—C9—C10    | 106.4 (4)  |
| O11 <sup>iii</sup> —Eu2—O4 <sup>iv</sup>   | 76.66 (10)  | C8—C9—H9     | 126.8      |
| O11 <sup>iii</sup> —Eu2—O12                | 122.45 (10) | C10—C9—H9    | 126.8      |
| O11 <sup>iii</sup> —Eu2—O9 <sup>v</sup>    | 146.46 (10) | O8—C11—C12   | 113.8 (4)  |
| O11 <sup>iii</sup> —Eu2—O10 <sup>v</sup>   | 157.65 (10) | C10—C11—O8   | 109.6 (4)  |
| O11 <sup>iii</sup> —Eu2—O18                | 85.71 (12)  | C10—C11—C12  | 136.6 (4)  |
| O11 <sup>iii</sup> —Eu2—C13                | 98.53 (11)  | C22A—N1—C23  | 125.9 (13) |
| O11—Eu2—C13                                | 25.32 (10)  | C22A—N1—C24  | 115.2 (13) |
| O11 <sup>iii</sup> —Eu2—C12 <sup>v</sup>   | 166.28 (12) | C23—N1—C24   | 118.8 (13) |
| O11—Eu2—C12 <sup>v</sup>                   | 115.15 (11) | C22—N1—C23A  | 122.4 (11) |
| O4 <sup>iv</sup> —Eu2—Eu2 <sup>iii</sup>   | 67.57 (7)   | C22—N1—C24A  | 117.3 (8)  |
| O4 <sup>iv</sup> —Eu2—O11                  | 68.23 (10)  | C23A—N1—C24A | 120.3 (12) |
| O4 <sup>iv</sup> —Eu2—O12                  | 71.05 (11)  | C14—C15—H15  | 126.4      |
| O4 <sup>iv</sup> —Eu2—O9 <sup>v</sup>      | 134.94 (11) | C14—C15—C16  | 107.2 (4)  |
| O4 <sup>iv</sup> —Eu2—O10 <sup>v</sup>     | 93.98 (10)  | C16—C15—H15  | 126.4      |
| O4 <sup>iv</sup> —Eu2—O18                  | 141.17 (11) | C17—C16—C15  | 106.4 (4)  |
| O4 <sup>iv</sup> —Eu2—C13                  | 66.67 (11)  | C17—C16—H16  | 126.8      |

|                                         |             |               |           |
|-----------------------------------------|-------------|---------------|-----------|
| O4 <sup>iv</sup> —Eu2—C12 <sup>v</sup>  | 115.58 (12) | C15—C16—H16   | 126.8     |
| O5 <sup>v</sup> —Eu2—Eu2 <sup>iii</sup> | 67.32 (7)   | O20—C19—H19   | 117.0     |
| O5 <sup>v</sup> —Eu2—O11 <sup>iii</sup> | 75.79 (10)  | O20—C19—N2    | 125.9 (7) |
| O5 <sup>v</sup> —Eu2—O11                | 68.67 (10)  | N2—C19—H19    | 117.0     |
| O5 <sup>v</sup> —Eu2—O4 <sup>iv</sup>   | 133.53 (11) | C19—N2—C21    | 120.4 (8) |
| O5 <sup>v</sup> —Eu2—O12                | 93.72 (12)  | C19—N2—C20    | 119.8 (8) |
| O5 <sup>v</sup> —Eu2—O9 <sup>v</sup>    | 72.76 (11)  | C20—N2—C21    | 119.7 (9) |
| O5 <sup>v</sup> —Eu2—O10 <sup>v</sup>   | 123.27 (10) | H22B—O22—H22C | 109.5     |
| O5 <sup>v</sup> —Eu2—O18                | 72.14 (12)  | N2—C21—H21A   | 109.5     |
| O5 <sup>v</sup> —Eu2—C13                | 81.34 (12)  | N2—C21—H21B   | 109.5     |
| O5 <sup>v</sup> —Eu2—C12 <sup>v</sup>   | 97.85 (12)  | N2—C21—H21C   | 109.5     |
| O2—Eu2—Eu2 <sup>iii</sup>               | 111.35 (7)  | H21A—C21—H21B | 109.5     |
| O2—Eu2—O11                              | 136.84 (10) | H21A—C21—H21C | 109.5     |
| O2—Eu2—O11 <sup>iii</sup>               | 78.71 (11)  | H21B—C21—H21C | 109.5     |
| O2—Eu2—O4 <sup>iv</sup>                 | 73.22 (11)  | N2—C20—H20A   | 109.5     |
| O2—Eu2—O5 <sup>v</sup>                  | 134.99 (12) | N2—C20—H20B   | 109.5     |
| O2—Eu2—O12                              | 131.28 (12) | N2—C20—H20C   | 109.5     |
| O2—Eu2—O9 <sup>v</sup>                  | 116.69 (11) | H20A—C20—H20B | 109.5     |
| O2—Eu2—O10 <sup>v</sup>                 | 79.15 (10)  | H20A—C20—H20C | 109.5     |
| O2—Eu2—O18                              | 69.50 (11)  | H20B—C20—H20C | 109.5     |

|                                          |             |               |            |
|------------------------------------------|-------------|---------------|------------|
| O2—Eu2—C13                               | 139.21 (11) | O19—C22A—N1   | 123.8 (13) |
| O2—Eu2—C12 <sup>v</sup>                  | 98.35 (11)  | O19—C22A—H22A | 118.1      |
| O12—Eu2—Eu2 <sup>iii</sup>               | 84.00 (7)   | N1—C22A—H22A  | 118.1      |
| O12—Eu2—O11                              | 49.98 (9)   | N1—C23—H23A   | 109.5      |
| O12—Eu2—O10 <sup>v</sup>                 | 71.53 (11)  | N1—C23—H23B   | 109.5      |
| O12—Eu2—C13                              | 24.68 (11)  | N1—C23—H23C   | 109.5      |
| O12—Eu2—C12 <sup>v</sup>                 | 69.53 (11)  | H23A—C23—H23B | 109.5      |
| O9 <sup>v</sup> —Eu2—Eu2 <sup>iii</sup>  | 131.13 (8)  | H23A—C23—H23C | 109.5      |
| O9 <sup>v</sup> —Eu2—O11                 | 104.23 (10) | H23B—C23—H23C | 109.5      |
| O9 <sup>v</sup> —Eu2—O12                 | 71.44 (11)  | N1—C24—H24A   | 109.5      |
| O9 <sup>v</sup> —Eu2—O10 <sup>v</sup>    | 50.52 (10)  | N1—C24—H24B   | 109.5      |
| O9 <sup>v</sup> —Eu2—C13                 | 88.08 (11)  | N1—C24—H24C   | 109.5      |
| O9 <sup>v</sup> —Eu2—C12 <sup>v</sup>    | 25.10 (11)  | H24A—C24—H24B | 109.5      |
| O10 <sup>v</sup> —Eu2—Eu2 <sup>iii</sup> | 153.38 (8)  | H24A—C24—H24C | 109.5      |
| O10 <sup>v</sup> —Eu2—O11                | 121.48 (10) | H24B—C24—H24C | 109.5      |
| O10 <sup>v</sup> —Eu2—C13                | 96.16 (12)  | O19—C22—N1    | 124.3 (8)  |
| O10 <sup>v</sup> —Eu2—C12 <sup>v</sup>   | 25.42 (11)  | O19—C22—H22   | 117.9      |
| O18—Eu2—Eu2 <sup>iii</sup>               | 117.01 (9)  | N1—C22—H22    | 117.9      |
| O18—Eu2—O11                              | 139.20 (11) | N1—C23A—H23D  | 109.5      |
| O18—Eu2—O12                              | 145.10 (11) | N1—C23A—H23E  | 109.5      |

|                             |             |                |       |
|-----------------------------|-------------|----------------|-------|
| O18—Eu2—O9 <sup>v</sup>     | 73.88 (12)  | N1—C23A—H23F   | 109.5 |
| O18—Eu2—O10 <sup>v</sup>    | 89.46 (12)  | H23D—C23A—H23E | 109.5 |
| O18—Eu2—C13                 | 151.28 (12) | H23D—C23A—H23F | 109.5 |
| O18—Eu2—C12 <sup>v</sup>    | 80.73 (13)  | H23E—C23A—H23F | 109.5 |
| Eu2 <sup>iii</sup> —O11—Eu2 | 105.72 (11) | H24D—C24A—H24E | 109.5 |
| C13—O11—Eu2                 | 90.2 (3)    | H24D—C24A—H24F | 109.5 |
| C13—O11—Eu2 <sup>iii</sup>  | 156.7 (3)   | H24E—C24A—H24F | 109.5 |
| Eu1—O6—Eu1 <sup>i</sup>     | 113.35 (11) | H23G—O23—H23H  | 109.5 |
| C7—O6—Eu1 <sup>i</sup>      | 86.7 (2)    |                |       |

Symmetry code(s): (i)  $-x+1, -y+1, -z+1$ ; (ii)  $-x+3/2, y+1/2, -z+3/2$ ; (iii)  $-x+2, -y+1, -z+2$ ; (iv)  $-x+1, -y+1, -z+2$ ; (v)  $x+1, y, z$ ; (vi)  $x-1, y, z$ ; (vii)  $-x+3/2, y-1/2, -z+3/2$ .

**Table S9**  
**Number and positions of Hydrogen bonds [ $\text{\AA}$  and  $^\circ$ ] in CP 3.**

| $D-H\cdots A$                                          | $D-H$ ( $\text{\AA}$ ) | $H\cdots A$ ( $\text{\AA}$ ) | $D\cdots A$ ( $\text{\AA}$ ) | $D-H\cdots A$ ( $^\circ$ ) |
|--------------------------------------------------------|------------------------|------------------------------|------------------------------|----------------------------|
| C23A <sup>b</sup> —H23F <sup>b</sup> —O23 <sup>i</sup> | 0.96                   | 1.77                         | 2.66 (7)                     | 153.6                      |
| O17—H17A—O10 <sup>ii</sup>                             | 0.85                   | 1.93                         | 2.711 (5)                    | 151.2                      |
| O17—H17B—O15 <sup>iii</sup>                            | 0.85                   | 1.90                         | 2.725 (5)                    | 164.7                      |
| O16—H16A—O20 <sup>iv</sup>                             | 0.85                   | 2.01                         | 2.785 (6)                    | 150.6                      |
| O16—H16B—O9                                            | 0.85                   | 2.02                         | 2.796 (5)                    | 150.8                      |
| O18—H18A—O21                                           | 0.85                   | 2.07                         | 2.725 (6)                    | 133.2                      |

|                            |      |      |            |       |
|----------------------------|------|------|------------|-------|
| O18—H18B...O20             | 0.85 | 1.99 | 2.777 (5)  | 152.6 |
| O21—H21D...O7 <sup>y</sup> | 0.85 | 2.00 | 2.817 (6)  | 161.9 |
| O21—H21E...O22             | 0.85 | 2.06 | 2.856 (11) | 156.9 |
| O22—H22B...O23             | 0.85 | 3.00 | 3.64 (2)   | 134.8 |

---

Symmetry code(s): (i)  $-x+3/2, y-1/2, -z+3/2$ ; (ii)  $x+1, y, z$ ; (iii)  $x-1/2, -y+1/2, z-1/2$ ; (iv)  $x-1, y, z$ ; (v)  $-x+1, -y+1, -z+1$ .

**Table S10**  
**Selected Bond lengths (Å) of CP 4.**

|                          |            |          |           |
|--------------------------|------------|----------|-----------|
| Ce01—O11                 | 2.447 (3)  | C1—C2    | 1.473 (6) |
| Ce01—O11 <sup>i</sup>    | 2.821 (3)  | O20—C22  | 1.203 (9) |
| Ce01—O12 <sup>i</sup>    | 2.605 (4)  | C18—C17  | 1.465 (7) |
| Ce01—O9 <sup>ii</sup>    | 2.569 (4)  | C14—C15  | 1.337 (7) |
| Ce01—O10 <sup>ii</sup>   | 2.623 (4)  | O21—H21G | 0.8503    |
| Ce01—O17                 | 2.535 (4)  | O21—H21H | 0.8495    |
| Ce01—O18                 | 2.482 (4)  | C2—C3    | 1.338 (7) |
| Ce01—O2                  | 2.322 (4)  | C17—C16  | 1.343 (7) |
| Ce01—C13 <sup>i</sup>    | 3.074 (5)  | C11—C10  | 1.347 (8) |
| Ce01—O19                 | 2.471 (4)  | C5—C4    | 1.347 (7) |
| Ce01—C12 <sup>ii</sup>   | 2.950 (5)  | C15—H15  | 0.9300    |
| Ce02—Ce02 <sup>iii</sup> | 4.1326 (5) | C15—C16  | 1.416 (7) |
| Ce02—O6 <sup>iii</sup>   | 2.707 (4)  | C4—H4    | 0.9300    |
| Ce02—O6                  | 2.480 (3)  | C4—C3    | 1.418 (7) |
| Ce02—O5 <sup>iv</sup>    | 2.476 (3)  | C16—H16  | 0.9300    |
| Ce02—O1                  | 2.422 (3)  | C10—H10  | 0.9300    |
| Ce02—O14 <sup>v</sup>    | 2.550 (3)  | C10—C9   | 1.426 (8) |
| Ce02—O7 <sup>iii</sup>   | 2.592 (4)  | C3—H3    | 0.9300    |
| Ce02—O16                 | 2.502 (4)  | C9—H9    | 0.9300    |

|                        |            |           |            |
|------------------------|------------|-----------|------------|
| Ce02—O4 <sup>v</sup>   | 2.458 (4)  | N1—C21A   | 1.477 (13) |
| Ce02—O15 <sup>v</sup>  | 2.692 (4)  | N1—C19A   | 1.328 (12) |
| Ce02—C7 <sup>iii</sup> | 3.008 (5)  | N1—C20A   | 1.399 (17) |
| Ce02—C18 <sup>v</sup>  | 2.987 (5)  | N1—C21    | 1.55 (3)   |
| O11—C13                | 1.270 (6)  | N1—C20    | 1.40 (3)   |
| O6—C7                  | 1.259 (6)  | N1—C19    | 1.33 (2)   |
| O5—C6                  | 1.263 (6)  | N2—C22    | 1.341 (11) |
| O12—C13                | 1.244 (6)  | N2—C23    | 1.447 (13) |
| O9—C12                 | 1.265 (6)  | N2—C24    | 1.396 (14) |
| O1—C1                  | 1.241 (5)  | C22—H22   | 0.9300     |
| O10—C12                | 1.254 (6)  | O22—H22A  | 0.8501     |
| O8—C8                  | 1.375 (6)  | O22—H22B  | 0.8496     |
| O8—C11                 | 1.369 (6)  | C23—H23A  | 0.9600     |
| O3—C2                  | 1.372 (5)  | C23—H23B  | 0.9600     |
| O3—C5                  | 1.372 (6)  | C23—H23C  | 0.9600     |
| O14—C18                | 1.255 (6)  | C24—H24A  | 0.9600     |
| O7—C7                  | 1.249 (6)  | C24—H24B  | 0.9600     |
| O16—H16A               | 0.847 (19) | C24—H24C  | 0.9600     |
| O16—H16B               | 0.851 (19) | C21A—H21A | 0.9600     |
| O4—C6                  | 1.253 (6)  | C21A—H21B | 0.9600     |



|          |            |           |        |
|----------|------------|-----------|--------|
| O15—C18  | 1.254 (6)  | C21A—H21C | 0.9600 |
| O13—C14  | 1.369 (6)  | C19A—H19A | 0.9300 |
| O13—C17  | 1.389 (6)  | C20A—H20A | 0.9600 |
| O17—H17A | 0.8509     | C20A—H20B | 0.9600 |
| O17—H17B | 0.8496     | C20A—H20C | 0.9600 |
| O18—H18A | 0.8541     | C21—H21D  | 0.9600 |
| O18—H18B | 0.8545     | C21—H21E  | 0.9600 |
| C7—C8    | 1.476 (7)  | C21—H21F  | 0.9600 |
| O2—C1    | 1.230 (6)  | C20—H20D  | 0.9600 |
| C13—C14  | 1.480 (7)  | C20—H20E  | 0.9600 |
| O19—C19A | 1.199 (11) | C20—H20F  | 0.9600 |
| O19—C19  | 1.22 (3)   | C19—H19   | 0.9300 |
| C8—C9    | 1.348 (8)  | O23—H23D  | 0.8500 |
| C6—C5    | 1.475 (7)  | O23—H23E  | 0.8498 |
| C12—C11  | 1.462 (7)  |           |        |

---

Symmetry code(s): (i)  $-x+1, -y+1, -z$ ; (ii)  $x-1/2, -y+1/2, z-1/2$ ; (iii)  $-x+2, -y+1, -z+1$ ; (iv)  $-x+1, -y+1, -z+1$ ; (v)  $x+1, y, z$ .

**Table S11**  
**Selected Bond angles (°) of CP 4.**

|                                          |             |                             |           |
|------------------------------------------|-------------|-----------------------------|-----------|
| O11—Ce01—O11 <sup>i</sup>                | 67.15 (12)  | Ce02—O16—H16B               | 128 (3)   |
| O11—Ce01—O12 <sup>i</sup>                | 114.71 (11) | H16A—O16—H16B               | 103 (4)   |
| O11—Ce01—O9 <sup>ii</sup>                | 74.78 (12)  | C6—O4—Ce02 <sup>vii</sup>   | 139.4 (3) |
| O11—Ce01—O10 <sup>ii</sup>               | 125.01 (12) | C18—O15—Ce02 <sup>vii</sup> | 90.9 (3)  |
| O11—Ce01—O17                             | 82.02 (12)  | C14—O13—C17                 | 106.6 (4) |
| O11—Ce01—O18                             | 96.16 (13)  | Ce01—O17—H17A               | 109.4     |
| O11—Ce01—C13 <sup>i</sup>                | 91.23 (12)  | Ce01—O17—H17B               | 109.2     |
| O11 <sup>i</sup> —Ce01—C13 <sup>i</sup>  | 24.39 (11)  | H17A—O17—H17B               | 109.5     |
| O11—Ce01—O19                             | 77.33 (15)  | Ce01—O18—H18A               | 109.4     |
| O11 <sup>i</sup> —Ce01—C12 <sup>ii</sup> | 79.84 (12)  | Ce01—O18—H18B               | 109.5     |
| O11—Ce01—C12 <sup>ii</sup>               | 100.09 (14) | H18A—O18—H18B               | 109.3     |
| O12 <sup>i</sup> —Ce01—O11 <sup>i</sup>  | 47.66 (10)  | O6—C7—Ce02 <sup>iii</sup>   | 64.1 (3)  |
| O12 <sup>i</sup> —Ce01—O10 <sup>ii</sup> | 69.06 (13)  | O6—C7—C8                    | 117.9 (5) |
| O12 <sup>i</sup> —Ce01—C13 <sup>i</sup>  | 23.50 (12)  | O7—C7—Ce02 <sup>iii</sup>   | 58.8 (3)  |
| O12 <sup>i</sup> —Ce01—C12 <sup>ii</sup> | 74.40 (14)  | O7—C7—O6                    | 122.8 (5) |
| O9 <sup>ii</sup> —Ce01—O11 <sup>i</sup>  | 70.16 (12)  | O7—C7—C8                    | 119.2 (5) |
| O9 <sup>ii</sup> —Ce01—O12 <sup>i</sup>  | 85.42 (13)  | C8—C7—Ce02 <sup>iii</sup>   | 177.1 (4) |
| O9 <sup>ii</sup> —Ce01—O10 <sup>ii</sup> | 50.34 (11)  | C1—O2—Ce01                  | 175.4 (4) |

|                                           |             |                            |            |
|-------------------------------------------|-------------|----------------------------|------------|
| O9 <sup>ii</sup> —Ce01—C13 <sup>i</sup>   | 79.19 (13)  | O11—C13—Ce01 <sup>i</sup>  | 66.6 (3)   |
| O9 <sup>ii</sup> —Ce01—C12 <sup>ii</sup>  | 25.31 (13)  | O11—C13—C14                | 120.0 (4)  |
| O10 <sup>ii</sup> —Ce01—O11 <sup>i</sup>  | 93.72 (11)  | O12—C13—Ce01 <sup>i</sup>  | 56.6 (3)   |
| O10 <sup>ii</sup> —Ce01—C13 <sup>i</sup>  | 82.62 (12)  | O12—C13—O11                | 122.2 (4)  |
| O10 <sup>ii</sup> —Ce01—C12 <sup>ii</sup> | 25.14 (12)  | O12—C13—C14                | 117.8 (4)  |
| O17—Ce01—O11 <sup>i</sup>                 | 67.36 (11)  | C14—C13—Ce01 <sup>i</sup>  | 166.7 (4)  |
| O17—Ce01—O12 <sup>i</sup>                 | 71.85 (13)  | C19A—O19—Ce01              | 164.7 (7)  |
| O17—Ce01—O9 <sup>ii</sup>                 | 136.82 (12) | C19—O19—Ce01               | 136.1 (12) |
| O17—Ce01—O10 <sup>ii</sup>                | 139.22 (13) | O8—C8—C7                   | 116.6 (4)  |
| O17—Ce01—C13 <sup>i</sup>                 | 65.26 (13)  | C9—C8—O8                   | 109.5 (5)  |
| O17—Ce01—C12 <sup>ii</sup>                | 143.52 (13) | C9—C8—C7                   | 133.8 (5)  |
| O18—Ce01—O11 <sup>i</sup>                 | 145.07 (13) | O5—C6—C5                   | 115.1 (5)  |
| O18—Ce01—O12 <sup>i</sup>                 | 138.26 (13) | O4—C6—O5                   | 125.9 (5)  |
| O18—Ce01—O9 <sup>ii</sup>                 | 75.98 (14)  | O4—C6—C5                   | 118.9 (4)  |
| O18—Ce01—O10 <sup>ii</sup>                | 70.31 (13)  | O9—C12—Ce01 <sup>vi</sup>  | 60.2 (3)   |
| O18—Ce01—O17                              | 143.36 (14) | O9—C12—C11                 | 118.0 (5)  |
| O18—Ce01—C13 <sup>i</sup>                 | 151.16 (14) | O10—C12—Ce01 <sup>vi</sup> | 62.7 (3)   |
| O18—Ce01—C12 <sup>ii</sup>                | 73.01 (14)  | O10—C12—O9                 | 122.5 (5)  |
| O2—Ce01—O11                               | 155.54 (16) | O10—C12—C11                | 119.5 (5)  |
| O2—Ce01—O11 <sup>i</sup>                  | 122.02 (12) | C11—C12—Ce01 <sup>vi</sup> | 172.2 (4)  |

|                                             |             |                             |           |
|---------------------------------------------|-------------|-----------------------------|-----------|
| O2—Ce01—O12 <sup>i</sup>                    | 77.06 (13)  | O1—C1—C2                    | 117.8 (4) |
| O2—Ce01—O9 <sup>ii</sup>                    | 129.02 (16) | O2—C1—O1                    | 125.1 (5) |
| O2—Ce01—O10 <sup>iii</sup>                  | 78.72 (16)  | O2—C1—C2                    | 117.1 (4) |
| O2—Ce01—O17                                 | 81.76 (15)  | O14—C18—Ce02 <sup>vii</sup> | 57.8 (3)  |
| O2—Ce01—O18                                 | 86.15 (15)  | O14—C18—C17                 | 118.8 (4) |
| O2—Ce01—C13 <sup>i</sup>                    | 98.43 (14)  | O15—C18—Ce02 <sup>vii</sup> | 64.3 (3)  |
| O2—Ce01—O19                                 | 80.13 (18)  | O15—C18—O14                 | 122.0 (5) |
| O2—Ce01—C12 <sup>ii</sup>                   | 103.85 (17) | O15—C18—C17                 | 119.1 (5) |
| O19—Ce01—O11 <sup>i</sup>                   | 127.72 (15) | C17—C18—Ce02 <sup>vii</sup> | 176.5 (4) |
| O19—Ce01—O12 <sup>i</sup>                   | 138.49 (15) | O13—C14—C13                 | 116.9 (4) |
| O19—Ce01—O9 <sup>ii</sup>                   | 135.25 (14) | C15—C14—O13                 | 110.5 (4) |
| O19—Ce01—O10 <sup>iii</sup>                 | 138.51 (15) | C15—C14—C13                 | 132.6 (5) |
| O19—Ce01—O17                                | 70.89 (14)  | H21G—O21—H21H               | 109.5     |
| O19—Ce01—O18                                | 73.02 (15)  | O3—C2—C1                    | 116.5 (4) |
| O19—Ce01—C13 <sup>i</sup>                   | 135.81 (15) | C3—C2—O3                    | 109.9 (4) |
| O19—Ce01—C12 <sup>ii</sup>                  | 145.42 (15) | C3—C2—C1                    | 133.3 (5) |
| C12 <sup>ii</sup> —Ce01—C13 <sup>i</sup>    | 78.26 (14)  | O13—C17—C18                 | 114.4 (4) |
| O6—Ce02—Ce02 <sup>iii</sup>                 | 39.13 (8)   | C16—C17—O13                 | 108.4 (4) |
| O6 <sup>iii</sup> —Ce02—Ce02 <sup>iii</sup> | 35.31 (7)   | C16—C17—C18                 | 137.1 (5) |
| O6—Ce02—O6 <sup>iii</sup>                   | 74.45 (12)  | O8—C11—C12                  | 117.0 (5) |

|                                            |             |             |           |
|--------------------------------------------|-------------|-------------|-----------|
| O6—Ce02—O14 <sup>v</sup>                   | 146.88 (12) | C10—C11—O8  | 109.4 (5) |
| O6—Ce02—O7 <sup>iii</sup>                  | 121.57 (12) | C10—C11—C12 | 133.6 (5) |
| O6—Ce02—O16                                | 86.59 (14)  | O3—C5—C6    | 117.7 (4) |
| O6—Ce02—O15 <sup>v</sup>                   | 158.58 (11) | C4—C5—O3    | 110.1 (4) |
| O6—Ce02—C7 <sup>iii</sup>                  | 98.03 (13)  | C4—C5—C6    | 132.0 (5) |
| O6 <sup>iii</sup> —Ce02—C7 <sup>iii</sup>  | 24.73 (12)  | C14—C15—H15 | 126.8     |
| O6—Ce02—C18 <sup>v</sup>                   | 166.62 (13) | C14—C15—C16 | 106.4 (5) |
| O6 <sup>iii</sup> —Ce02—C18 <sup>v</sup>   | 114.42 (12) | C16—C15—H15 | 126.8     |
| O5 <sup>iv</sup> —Ce02—Ce02 <sup>iii</sup> | 67.07 (8)   | C5—C4—H4    | 126.8     |
| O5 <sup>iv</sup> —Ce02—O6 <sup>iii</sup>   | 68.14 (11)  | C5—C4—C3    | 106.4 (5) |
| O5 <sup>iv</sup> —Ce02—O6                  | 75.95 (12)  | C3—C4—H4    | 126.8     |
| O5 <sup>iv</sup> —Ce02—O14 <sup>v</sup>    | 135.09 (12) | C17—C16—C15 | 108.1 (5) |
| O5 <sup>iv</sup> —Ce02—O7 <sup>iii</sup>   | 70.91 (13)  | C17—C16—H16 | 125.9     |
| O5 <sup>iv</sup> —Ce02—O16                 | 141.72 (13) | C15—C16—H16 | 125.9     |
| O5 <sup>iv</sup> —Ce02—O15 <sup>v</sup>    | 95.15 (12)  | C11—C10—H10 | 126.4     |
| O5 <sup>iv</sup> —Ce02—C7 <sup>iii</sup>   | 66.56 (13)  | C11—C10—C9  | 107.2 (5) |
| O5 <sup>iv</sup> —Ce02—C18 <sup>v</sup>    | 116.19 (13) | C9—C10—H10  | 126.4     |
| O1—Ce02—Ce02 <sup>iii</sup>                | 110.48 (9)  | C2—C3—C4    | 107.3 (5) |
| O1—Ce02—O6 <sup>iii</sup>                  | 136.68 (11) | C2—C3—H3    | 126.4     |
| O1—Ce02—O6                                 | 77.81 (12)  | C4—C3—H3    | 126.4     |

|                                             |             |               |            |
|---------------------------------------------|-------------|---------------|------------|
| O1—Ce02—O5 <sup>iv</sup>                    | 73.28 (12)  | C8—C9—C10     | 106.6 (5)  |
| O1—Ce02—O14 <sup>v</sup>                    | 117.46 (12) | C8—C9—H9      | 126.7      |
| O1—Ce02—O7 <sup>iii</sup>                   | 132.08 (13) | C10—C9—H9     | 126.7      |
| O1—Ce02—O16                                 | 69.82 (13)  | C19A—N1—C21A  | 120.4 (9)  |
| O1—Ce02—O4 <sup>v</sup>                     | 133.87 (14) | C19A—N1—C20A  | 120.9 (9)  |
| O1—Ce02—O15 <sup>v</sup>                    | 80.98 (12)  | C20A—N1—C21A  | 118.5 (10) |
| O1—Ce02—C7 <sup>iii</sup>                   | 139.32 (13) | C20—N1—C21    | 116.1 (15) |
| O1—Ce02—C18 <sup>v</sup>                    | 99.66 (13)  | C19—N1—C21    | 116.1 (17) |
| O14 <sup>v</sup> —Ce02—Ce02 <sup>iii</sup>  | 131.18 (9)  | C19—N1—C20    | 127.6 (17) |
| O14 <sup>v</sup> —Ce02—O6 <sup>iii</sup>    | 103.77 (12) | C22—N2—C23    | 119.9 (10) |
| O14 <sup>v</sup> —Ce02—O7 <sup>iii</sup>    | 71.75 (13)  | C22—N2—C24    | 120.9 (10) |
| O14 <sup>v</sup> —Ce02—O15 <sup>v</sup>     | 49.42 (11)  | C24—N2—C23    | 119.2 (11) |
| O14 <sup>v</sup> —Ce02—C7 <sup>iii</sup>    | 88.14 (13)  | O20—C22—N2    | 125.4 (8)  |
| O14 <sup>v</sup> —Ce02—C18 <sup>v</sup>     | 24.61 (12)  | O20—C22—H22   | 117.3      |
| O7 <sup>iii</sup> —Ce02—Ce02 <sup>iii</sup> | 83.38 (8)   | N2—C22—H22    | 117.3      |
| O7 <sup>iii</sup> —Ce02—O6 <sup>iii</sup>   | 49.04 (11)  | H22A—O22—H22B | 109.5      |
| O7 <sup>iii</sup> —Ce02—O15 <sup>v</sup>    | 71.74 (12)  | N2—C23—H23A   | 109.5      |
| O7 <sup>iii</sup> —Ce02—C7 <sup>iii</sup>   | 24.34 (12)  | N2—C23—H23B   | 109.5      |
| O7 <sup>iii</sup> —Ce02—C18 <sup>v</sup>    | 69.91 (13)  | N2—C23—H23C   | 109.5      |
| O16—Ce02—Ce02 <sup>iii</sup>                | 117.42 (12) | H23A—C23—H23B | 109.5      |

|                                            |             |                |            |
|--------------------------------------------|-------------|----------------|------------|
| O16—Ce02—O6 <sup>iii</sup>                 | 139.25 (13) | H23A—C23—H23C  | 109.5      |
| O16—Ce02—O14 <sup>v</sup>                  | 73.42 (14)  | H23B—C23—H23C  | 109.5      |
| O16—Ce02—O7 <sup>iii</sup>                 | 144.88 (14) | N2—C24—H24A    | 109.5      |
| O16—Ce02—O15 <sup>v</sup>                  | 88.92 (15)  | N2—C24—H24B    | 109.5      |
| O16—Ce02—C7 <sup>iii</sup>                 | 150.85 (13) | N2—C24—H24C    | 109.5      |
| O16—Ce02—C18 <sup>v</sup>                  | 80.25 (15)  | H24A—C24—H24B  | 109.5      |
| O4 <sup>v</sup> —Ce02—Ce02 <sup>iii</sup>  | 66.83 (9)   | H24A—C24—H24C  | 109.5      |
| O4 <sup>v</sup> —Ce02—O6 <sup>iii</sup>    | 68.53 (12)  | H24B—C24—H24C  | 109.5      |
| O4 <sup>v</sup> —Ce02—O6                   | 75.16 (12)  | N1—C21A—H21A   | 109.5      |
| O4 <sup>v</sup> —Ce02—O5 <sup>iv</sup>     | 132.74 (12) | N1—C21A—H21B   | 109.5      |
| O4 <sup>v</sup> —Ce02—O14 <sup>v</sup>     | 73.65 (12)  | N1—C21A—H21C   | 109.5      |
| O4 <sup>v</sup> —Ce02—O7 <sup>iii</sup>    | 94.01 (14)  | H21A—C21A—H21B | 109.5      |
| O4 <sup>v</sup> —Ce02—O16                  | 71.90 (14)  | H21A—C21A—H21C | 109.5      |
| O4 <sup>v</sup> —Ce02—O15 <sup>v</sup>     | 123.06 (11) | H21B—C21A—H21C | 109.5      |
| O4 <sup>v</sup> —Ce02—C7 <sup>iii</sup>    | 81.45 (14)  | O19—C19A—N1    | 125.2 (10) |
| O4 <sup>v</sup> —Ce02—C18 <sup>v</sup>     | 98.25 (13)  | O19—C19A—H19A  | 117.4      |
| O15 <sup>v</sup> —Ce02—Ce02 <sup>iii</sup> | 153.37 (9)  | N1—C19A—H19A   | 117.4      |
| O15 <sup>v</sup> —Ce02—O6 <sup>iii</sup>   | 120.79 (12) | N1—C20A—H20A   | 109.5      |
| O15 <sup>v</sup> —Ce02—C7 <sup>iii</sup>   | 96.06 (13)  | N1—C20A—H20B   | 109.5      |
| O15 <sup>v</sup> —Ce02—C18 <sup>v</sup>    | 24.82 (12)  | N1—C20A—H20C   | 109.5      |

|                                             |             |                |         |
|---------------------------------------------|-------------|----------------|---------|
| C7 <sup>iii</sup> —Ce02—Ce02 <sup>iii</sup> | 59.26 (10)  | H20A—C20A—H20B | 109.5   |
| C18 <sup>v</sup> —Ce02—Ce02 <sup>iii</sup>  | 148.71 (10) | H20A—C20A—H20C | 109.5   |
| C18 <sup>v</sup> —Ce02—C7 <sup>iii</sup>    | 92.37 (14)  | H20B—C20A—H20C | 109.5   |
| Ce01—O11—Ce01 <sup>i</sup>                  | 112.85 (12) | N1—C21—H21D    | 109.5   |
| C13—O11—Ce01 <sup>i</sup>                   | 89.0 (3)    | N1—C21—H21E    | 109.5   |
| C13—O11—Ce01                                | 156.2 (3)   | N1—C21—H21F    | 109.5   |
| Ce02—O6—Ce02 <sup>iii</sup>                 | 105.55 (12) | H21D—C21—H21E  | 109.5   |
| C7—O6—Ce02 <sup>iii</sup>                   | 91.1 (3)    | H21D—C21—H21F  | 109.5   |
| C7—O6—Ce02                                  | 155.6 (3)   | H21E—C21—H21F  | 109.5   |
| C6—O5—Ce02 <sup>iv</sup>                    | 135.7 (3)   | N1—C20—H20D    | 109.5   |
| C13—O12—Ce01 <sup>i</sup>                   | 99.9 (3)    | N1—C20—H20E    | 109.5   |
| C12—O9—Ce01 <sup>vi</sup>                   | 94.5 (3)    | N1—C20—H20F    | 109.5   |
| C1—O1—Ce02                                  | 146.9 (3)   | H20D—C20—H20E  | 109.5   |
| C12—O10—Ce01 <sup>vi</sup>                  | 92.2 (3)    | H20D—C20—H20F  | 109.5   |
| C11—O8—C8                                   | 107.3 (4)   | H20E—C20—H20F  | 109.5   |
| C2—O3—C5                                    | 106.3 (4)   | O19—C19—N1     | 123 (2) |
| C18—O14—Ce02 <sup>vii</sup>                 | 97.6 (3)    | O19—C19—H19    | 118.5   |
| C7—O7—Ce02 <sup>iii</sup>                   | 96.8 (3)    | N1—C19—H19     | 118.5   |
| Ce02—O16—H16A                               | 128 (3)     | H23D—O23—H23E  | 109.5   |



Symmetry code(s): (i)  $-x+1, -y+1, -z$ ; (ii)  $x-1/2, -y+1/2, z-1/2$ ; (iii)  $-x+2, -y+1, -z+1$ ; (iv)  $-x+1, -y+1, -z+1$ ; (v)  $x+1, y, z$ ; (vi)  $x+1/2, -y+1/2, z+1/2$ ; (vii)  $x-1, y, z$ .

**Table S12**  
**Number and positions of Hydrogen bonds [ $\text{\AA}$  and  $^\circ$ ] in CP 4.**

| $D-H\cdots A$               | $D-H$ ( $\text{\AA}$ ) | $H\cdots A$ ( $\text{\AA}$ ) | $D\cdots A$ ( $\text{\AA}$ ) | $D-H\cdots A$ ( $^\circ$ ) |
|-----------------------------|------------------------|------------------------------|------------------------------|----------------------------|
| $C20A^{a-H20B_a}\cdots O23$ | 0.96                   | 1.88                         | 2.72 (4)                     | 145.6                      |
| $O16-H16A\cdots O21$        | 0.847 (19)             | 1.89 (2)                     | 2.731 (7)                    | 177 (4)                    |
| $O16-H16B\cdots O20^i$      | 0.851 (19)             | 1.91 (2)                     | 2.761 (6)                    | 175 (7)                    |
| $O17-H17A\cdots O15^i$      | 0.85                   | 2.18                         | 2.713 (5)                    | 120.7                      |
| $O18-H18A\cdots O20$        | 0.85                   | 1.99                         | 2.788 (7)                    | 155.4                      |
| $O21-H21G\cdots O22$        | 0.85                   | 2.05                         | 2.883 (14)                   | 165.9                      |
| $O21-H21H\cdots O12^{ii}$   | 0.85                   | 1.98                         | 2.819 (6)                    | 167.3                      |
| $O22-H22B\cdots O23^{iii}$  | 0.85                   | 1.95                         | 2.68 (3)                     | 143.9                      |

Symmetry code(s): (i)  $x+1, y, z$ ; (ii)  $-x+1, -y+1, -z$ ; (iii)  $-x+3/2, y-1/2, -z+1/2$ .

**Table S13**  
**Selected Bond lengths ( $\text{\AA}$ ) of CP 5.**

|                |           |            |        |
|----------------|-----------|------------|--------|
| $Nd1-O6$       | 2.413 (3) | $O16-H16B$ | 0.8716 |
| $Nd1-O6^i$     | 2.818 (3) | $O18-H18A$ | 0.8743 |
| $Nd1-O14^{ii}$ | 2.528 (4) | $O18-H18B$ | 0.8715 |

|                        |            |          |           |
|------------------------|------------|----------|-----------|
| Nd1—O7 <sup>i</sup>    | 2.555 (3)  | C13—C14  | 1.487 (7) |
| Nd1—O15 <sup>ii</sup>  | 2.578 (4)  | O1—C1    | 1.221 (5) |
| Nd1—O16                | 2.496 (4)  | C7—C8    | 1.466 (7) |
| Nd1—O18                | 2.452 (4)  | C6—C5    | 1.482 (6) |
| Nd1—O1                 | 2.291 (3)  | C1—C2    | 1.484 (6) |
| Nd1—C7 <sup>i</sup>    | 3.056 (5)  | C18—C17  | 1.463 (7) |
| Nd1—C18 <sup>ii</sup>  | 2.905 (5)  | C12—C11  | 1.473 (6) |
| Nd1—O17                | 2.487 (5)  | O21—H21D | 0.8496    |
| Nd2—Nd2 <sup>iii</sup> | 4.0746 (5) | O21—H21E | 0.8505    |
| Nd2—O11 <sup>iii</sup> | 2.666 (3)  | C11—C10  | 1.339 (6) |
| Nd2—O11                | 2.443 (3)  | O17—H17A | 0.8762    |
| Nd2—O5 <sup>iv</sup>   | 2.449 (3)  | O17—H17B | 0.9660    |
| Nd2—O12 <sup>iii</sup> | 2.563 (4)  | C8—C9    | 1.346 (7) |
| Nd2—O4 <sup>v</sup>    | 2.423 (3)  | C14—C15  | 1.344 (8) |
| Nd2—O10 <sup>v</sup>   | 2.643 (3)  | O20—C19  | 1.230 (9) |
| Nd2—O2                 | 2.385 (3)  | C2—C3    | 1.341 (7) |
| Nd2—O9 <sup>v</sup>    | 2.517 (3)  | C4—H4    | 0.9300    |
| Nd2—O19                | 2.468 (4)  | C4—C3    | 1.413 (7) |
| Nd2—C13 <sup>iii</sup> | 2.972 (5)  | C4—C5    | 1.359 (7) |
| Nd2—C12 <sup>v</sup>   | 2.947 (5)  | C17—C16  | 1.339 (8) |

|          |           |          |            |
|----------|-----------|----------|------------|
| O6—C7    | 1.269 (6) | C10—H10  | 0.9300     |
| O11—C13  | 1.271 (6) | C10—C9   | 1.410 (7)  |
| O5—C6    | 1.258 (6) | C9—H9    | 0.9300     |
| O12—C13  | 1.239 (6) | C3—H3    | 0.9300     |
| O14—C18  | 1.266 (6) | C15—H15  | 0.9300     |
| O4—C6    | 1.253 (6) | C15—C16  | 1.408 (8)  |
| O8—C11   | 1.383 (5) | C16—H16  | 0.9300     |
| O8—C8    | 1.368 (5) | N1—C19   | 1.340 (11) |
| O7—C7    | 1.247 (6) | N1—C21   | 1.437 (14) |
| O15—C18  | 1.254 (6) | N1—C20   | 1.441 (13) |
| O10—C12  | 1.251 (6) | C19—H19  | 0.9300     |
| O2—C1    | 1.240 (5) | O22—H22A | 0.8505     |
| O13—C14  | 1.377 (6) | O22—H22B | 0.8499     |
| O13—C17  | 1.374 (6) | C21—H21A | 0.9600     |
| O9—C12   | 1.259 (6) | C21—H21B | 0.9600     |
| O19—H19A | 0.8723    | C21—H21C | 0.9600     |
| O19—H19B | 0.9180    | C20—H20A | 0.9600     |
| O3—C2    | 1.361 (5) | C20—H20B | 0.9600     |
| O3—C5    | 1.369 (6) | C20—H20C | 0.9600     |
| O16—H16A | 0.8726    |          |            |

Symmetry code(s): (i)  $-x+1, -y+1, -z+1$ ; (ii)  $x-1/2, -y+1/2, z-1/2$ ; (iii)  $-x+2, -y+1, -z+2$ ; (iv)  $-x+1, -y+1, -z+2$ ; (v)  $x+1, y, z$ .

**Table S14**  
**Selected Bond angles (°) of CP 5.**

|                                          |             |                                          |             |
|------------------------------------------|-------------|------------------------------------------|-------------|
| O6—Nd1—O6 <sup>i</sup>                   | 66.98 (12)  | C12 <sup>v</sup> —Nd2—Nd2 <sup>iii</sup> | 149.08 (10) |
| O6—Nd1—O14 <sup>ii</sup>                 | 75.59 (12)  | C12 <sup>v</sup> —Nd2—C13 <sup>iii</sup> | 91.89 (13)  |
| O6—Nd1—O7 <sup>i</sup>                   | 114.83 (11) | Nd1—O6—Nd1 <sup>i</sup>                  | 113.02 (12) |
| O6—Nd1—O15 <sup>ii</sup>                 | 126.59 (12) | C7—O6—Nd1 <sup>i</sup>                   | 88.3 (3)    |
| O6—Nd1—O16                               | 80.57 (12)  | C7—O6—Nd1                                | 157.0 (3)   |
| O6—Nd1—O18                               | 95.33 (13)  | Nd2—O11—Nd2 <sup>iii</sup>               | 105.71 (12) |
| O6—Nd1—C7 <sup>i</sup>                   | 91.24 (12)  | C13—O11—Nd2                              | 155.9 (3)   |
| O6 <sup>i</sup> —Nd1—C7 <sup>i</sup>     | 24.52 (11)  | C13—O11—Nd2 <sup>iii</sup>               | 90.9 (3)    |
| O6—Nd1—C18 <sup>ii</sup>                 | 101.33 (13) | C6—O5—Nd2 <sup>iv</sup>                  | 134.0 (3)   |
| O6 <sup>i</sup> —Nd1—C18 <sup>ii</sup>   | 80.90 (12)  | C13—O12—Nd2 <sup>iii</sup>               | 96.6 (3)    |
| O6—Nd1—O17                               | 78.36 (16)  | C18—O14—Nd1 <sup>vi</sup>                | 94.0 (3)    |
| O14 <sup>ii</sup> —Nd1—O6 <sup>i</sup>   | 69.87 (11)  | C6—O4—Nd2 <sup>vii</sup>                 | 139.1 (3)   |
| O14 <sup>ii</sup> —Nd1—O7 <sup>i</sup>   | 84.61 (13)  | C8—O8—C11                                | 106.3 (3)   |
| O14 <sup>ii</sup> —Nd1—O15 <sup>ii</sup> | 51.24 (11)  | C7—O7—Nd1 <sup>i</sup>                   | 101.3 (3)   |
| O14 <sup>ii</sup> —Nd1—C7 <sup>i</sup>   | 78.28 (13)  | C18—O15—Nd1 <sup>vi</sup>                | 92.0 (3)    |
| O14 <sup>ii</sup> —Nd1—C18 <sup>ii</sup> | 25.76 (12)  | C12—O10—Nd2 <sup>vii</sup>               | 91.2 (3)    |
| O7 <sup>i</sup> —Nd1—O6 <sup>i</sup>     | 47.94 (10)  | C1—O2—Nd2                                | 148.6 (3)   |

|                                          |             |                            |           |
|------------------------------------------|-------------|----------------------------|-----------|
| O7 <sup>i</sup> —Nd1—O15 <sup>ii</sup>   | 69.57 (12)  | C17—O13—C14                | 106.9 (4) |
| O7 <sup>i</sup> —Nd1—C7 <sup>i</sup>     | 23.59 (12)  | C12—O9—Nd2 <sup>vii</sup>  | 96.9 (3)  |
| O7 <sup>i</sup> —Nd1—C18 <sup>ii</sup>   | 74.42 (14)  | Nd2—O19—H19A               | 95.2      |
| O15 <sup>ii</sup> —Nd1—O6 <sup>i</sup>   | 95.42 (11)  | Nd2—O19—H19B               | 151.3     |
| O15 <sup>ii</sup> —Nd1—C7 <sup>i</sup>   | 83.49 (12)  | H19A—O19—H19B              | 102.0     |
| O15 <sup>ii</sup> —Nd1—C18 <sup>ii</sup> | 25.55 (12)  | C2—O3—C5                   | 106.1 (4) |
| O16—Nd1—O6 <sup>i</sup>                  | 67.90 (11)  | Nd1—O16—H16A               | 110.8     |
| O16—Nd1—O14 <sup>ii</sup>                | 136.91 (12) | Nd1—O16—H16B               | 110.3     |
| O16—Nd1—O7 <sup>i</sup>                  | 73.56 (13)  | H16A—O16—H16B              | 108.3     |
| O16—Nd1—O15 <sup>ii</sup>                | 141.00 (13) | Nd1—O18—H18A               | 110.3     |
| O16—Nd1—C7 <sup>i</sup>                  | 66.82 (13)  | Nd1—O18—H18B               | 110.3     |
| O16—Nd1—C18 <sup>ii</sup>                | 145.34 (14) | H18A—O18—H18B              | 108.4     |
| O18—Nd1—O6 <sup>i</sup>                  | 144.67 (13) | O11—C13—Nd2 <sup>iii</sup> | 63.7 (3)  |
| O18—Nd1—O14 <sup>ii</sup>                | 76.30 (14)  | O11—C13—C14                | 117.2 (4) |
| O18—Nd1—O7 <sup>i</sup>                  | 138.91 (13) | O12—C13—Nd2 <sup>iii</sup> | 58.9 (3)  |
| O18—Nd1—O15 <sup>ii</sup>                | 70.09 (13)  | O12—C13—O11                | 122.4 (5) |
| O18—Nd1—O16                              | 141.95 (14) | O12—C13—C14                | 120.4 (4) |
| O18—Nd1—C7 <sup>i</sup>                  | 151.19 (15) | C14—C13—Nd2 <sup>iii</sup> | 176.7 (3) |
| O18—Nd1—C18 <sup>ii</sup>                | 72.69 (15)  | C1—O1—Nd1                  | 172.4 (4) |
| O18—Nd1—O17                              | 71.64 (18)  | O6—C7—Nd1 <sup>i</sup>     | 67.2 (2)  |

|                                            |             |                            |           |
|--------------------------------------------|-------------|----------------------------|-----------|
| O1—Nd1—O6                                  | 154.98 (16) | O6—C7—C8                   | 119.8 (4) |
| O1—Nd1—O6 <sup>i</sup>                     | 122.23 (12) | O7—C7—Nd1 <sup>i</sup>     | 55.1 (2)  |
| O1—Nd1—O14 <sup>ii</sup>                   | 128.84 (16) | O7—C7—O6                   | 121.6 (4) |
| O1—Nd1—O7 <sup>i</sup>                     | 77.16 (13)  | O7—C7—C8                   | 118.6 (4) |
| O1—Nd1—O15 <sup>ii</sup>                   | 77.60 (16)  | C8—C7—Nd1 <sup>i</sup>     | 167.4 (3) |
| O1—Nd1—O16                                 | 82.34 (15)  | O5—C6—C5                   | 115.4 (4) |
| O1—Nd1—O18                                 | 87.00 (15)  | O4—C6—O5                   | 126.8 (4) |
| O1—Nd1—C7 <sup>i</sup>                     | 98.66 (13)  | O4—C6—C5                   | 117.8 (4) |
| O1—Nd1—C18 <sup>ii</sup>                   | 103.13 (17) | O2—C1—C2                   | 118.1 (4) |
| O1—Nd1—O17                                 | 78.78 (18)  | O1—C1—O2                   | 125.7 (4) |
| C18 <sup>ii</sup> —Nd1—C7 <sup>i</sup>     | 78.52 (14)  | O1—C1—C2                   | 116.2 (4) |
| O17—Nd1—O6 <sup>i</sup>                    | 128.97 (17) | O14—C18—Nd1 <sup>vi</sup>  | 60.2 (3)  |
| O17—Nd1—O14 <sup>ii</sup>                  | 136.10 (14) | O14—C18—C17                | 117.9 (5) |
| O17—Nd1—O7 <sup>i</sup>                    | 138.82 (15) | O15—C18—Nd1 <sup>vi</sup>  | 62.5 (3)  |
| O17—Nd1—O15 <sup>ii</sup>                  | 135.60 (17) | O15—C18—O14                | 122.4 (5) |
| O17—Nd1—O16                                | 70.48 (17)  | O15—C18—C17                | 119.7 (5) |
| O17—Nd1—C7 <sup>i</sup>                    | 137.15 (17) | C17—C18—Nd1 <sup>vi</sup>  | 173.1 (4) |
| O17—Nd1—C18 <sup>ii</sup>                  | 144.12 (17) | O10—C12—Nd2 <sup>vii</sup> | 63.7 (3)  |
| O11 <sup>iii</sup> —Nd2—Nd2 <sup>iii</sup> | 35.26 (7)   | O10—C12—O9                 | 121.7 (4) |
| O11—Nd2—Nd2 <sup>iii</sup>                 | 39.04 (8)   | O10—C12—C11                | 119.6 (4) |

|                                            |             |                            |           |
|--------------------------------------------|-------------|----------------------------|-----------|
| O11—Nd2—O11 <sup>iii</sup>                 | 74.29 (12)  | O9—C12—Nd2 <sup>vii</sup>  | 58.0 (2)  |
| O11—Nd2—O5 <sup>iv</sup>                   | 76.91 (11)  | O9—C12—C11                 | 118.7 (4) |
| O11—Nd2—O12 <sup>iii</sup>                 | 122.35 (11) | C11—C12—Nd2 <sup>vii</sup> | 176.6 (3) |
| O11—Nd2—O10 <sup>v</sup>                   | 157.81 (11) | H21D—O21—H21E              | 109.5     |
| O11—Nd2—O9 <sup>v</sup>                    | 147.04 (11) | O8—C11—C12                 | 113.4 (4) |
| O11—Nd2—O19                                | 86.77 (13)  | C10—C11—O8                 | 109.4 (4) |
| O11 <sup>iii</sup> —Nd2—C13 <sup>iii</sup> | 25.32 (11)  | C10—C11—C12                | 137.1 (5) |
| O11—Nd2—C13 <sup>iii</sup>                 | 98.49 (12)  | Nd1—O17—H17A               | 96.8      |
| O11 <sup>iii</sup> —Nd2—C12 <sup>v</sup>   | 114.70 (12) | Nd1—O17—H17B               | 126.2     |
| O11—Nd2—C12 <sup>v</sup>                   | 167.11 (13) | H17A—O17—H17B              | 98.2      |
| O5 <sup>iv</sup> —Nd2—Nd2 <sup>iii</sup>   | 67.84 (8)   | O8—C8—C7                   | 116.8 (4) |
| O5 <sup>iv</sup> —Nd2—O11 <sup>iii</sup>   | 68.35 (11)  | C9—C8—O8                   | 109.9 (4) |
| O5 <sup>iv</sup> —Nd2—O12 <sup>iii</sup>   | 71.31 (13)  | C9—C8—C7                   | 133.3 (4) |
| O5 <sup>iv</sup> —Nd2—O10 <sup>v</sup>     | 93.20 (11)  | O13—C14—C13                | 115.9 (4) |
| O5 <sup>iv</sup> —Nd2—O9 <sup>v</sup>      | 134.16 (12) | C15—C14—O13                | 109.3 (5) |
| O5 <sup>iv</sup> —Nd2—O19                  | 141.76 (13) | C15—C14—C13                | 134.8 (5) |
| O5 <sup>iv</sup> —Nd2—C13 <sup>iii</sup>   | 66.49 (13)  | O3—C2—C1                   | 116.6 (4) |
| O5 <sup>iv</sup> —Nd2—C12 <sup>v</sup>     | 114.52 (13) | C3—C2—O3                   | 110.3 (4) |
| O12 <sup>iii</sup> —Nd2—Nd2 <sup>iii</sup> | 84.14 (8)   | C3—C2—C1                   | 132.9 (4) |
| O12 <sup>iii</sup> —Nd2—O11 <sup>iii</sup> | 49.72 (10)  | C3—C4—H4                   | 127.3     |

|                                            |             |             |           |
|--------------------------------------------|-------------|-------------|-----------|
| O12 <sup>iii</sup> —Nd2—O10 <sup>v</sup>   | 71.18 (12)  | C5—C4—H4    | 127.3     |
| O12 <sup>iii</sup> —Nd2—C13 <sup>iii</sup> | 24.46 (11)  | C5—C4—C3    | 105.4 (5) |
| O12 <sup>iii</sup> —Nd2—C12 <sup>v</sup>   | 68.91 (12)  | O13—C17—C18 | 117.2 (4) |
| O4 <sup>v</sup> —Nd2—Nd2 <sup>iii</sup>    | 67.04 (8)   | C16—C17—O13 | 109.1 (5) |
| O4 <sup>v</sup> —Nd2—O11                   | 74.85 (11)  | C16—C17—C18 | 133.6 (5) |
| O4 <sup>v</sup> —Nd2—O11 <sup>iii</sup>    | 69.10 (11)  | C11—C10—H10 | 126.3     |
| O4 <sup>v</sup> —Nd2—O5 <sup>iv</sup>      | 133.70 (12) | C11—C10—C9  | 107.4 (4) |
| O4 <sup>v</sup> —Nd2—O12 <sup>iii</sup>    | 94.26 (13)  | C9—C10—H10  | 126.3     |
| O4 <sup>v</sup> —Nd2—O10 <sup>v</sup>      | 124.28 (11) | C8—C9—C10   | 106.9 (4) |
| O4 <sup>v</sup> —Nd2—O9 <sup>v</sup>       | 74.09 (11)  | C8—C9—H9    | 126.5     |
| O4 <sup>v</sup> —Nd2—O19                   | 71.70 (13)  | C10—C9—H9   | 126.5     |
| O4 <sup>v</sup> —Nd2—C13 <sup>iii</sup>    | 82.31 (13)  | C2—C3—C4    | 107.7 (5) |
| O4 <sup>v</sup> —Nd2—C12 <sup>v</sup>      | 99.18 (13)  | C2—C3—H3    | 126.2     |
| O10 <sup>v</sup> —Nd2—Nd2 <sup>iii</sup>   | 152.96 (9)  | C4—C3—H3    | 126.2     |
| O10 <sup>v</sup> —Nd2—O11 <sup>iii</sup>   | 120.85 (11) | O3—C5—C6    | 117.6 (4) |
| O10 <sup>v</sup> —Nd2—C13 <sup>iii</sup>   | 95.53 (13)  | C4—C5—O3    | 110.6 (4) |
| O10 <sup>v</sup> —Nd2—C12 <sup>v</sup>     | 25.12 (12)  | C4—C5—C6    | 131.6 (5) |
| O2—Nd2—Nd2 <sup>iii</sup>                  | 110.72 (8)  | C14—C15—H15 | 126.5     |
| O2—Nd2—O11 <sup>iii</sup>                  | 136.77 (11) | C14—C15—C16 | 106.9 (5) |
| O2—Nd2—O11                                 | 78.17 (12)  | C16—C15—H15 | 126.5     |



|                                         |             |               |            |
|-----------------------------------------|-------------|---------------|------------|
| O2—Nd2—O5 <sup>iv</sup>                 | 73.42 (12)  | C17—C16—C15   | 107.8 (5)  |
| O2—Nd2—O12 <sup>iii</sup>               | 132.36 (13) | C17—C16—H16   | 126.1      |
| O2—Nd2—O4 <sup>v</sup>                  | 133.37 (13) | C15—C16—H16   | 126.1      |
| O2—Nd2—O10 <sup>v</sup>                 | 79.97 (12)  | C19—N1—C21    | 120.2 (10) |
| O2—Nd2—O9 <sup>v</sup>                  | 116.79 (12) | C19—N1—C20    | 120.5 (10) |
| O2—Nd2—O19                              | 69.46 (13)  | C21—N1—C20    | 119.3 (11) |
| O2—Nd2—C13 <sup>iii</sup>               | 139.36 (13) | O20—C19—N1    | 126.1 (9)  |
| O2—Nd2—C12 <sup>v</sup>                 | 98.85 (13)  | O20—C19—H19   | 116.9      |
| O9 <sup>v</sup> —Nd2—Nd2 <sup>iii</sup> | 131.63 (8)  | N1—C19—H19    | 116.9      |
| O9 <sup>v</sup> —Nd2—O11 <sup>iii</sup> | 104.27 (11) | H22A—O22—H22B | 109.5      |
| O9 <sup>v</sup> —Nd2—O12 <sup>iii</sup> | 70.93 (12)  | N1—C21—H21A   | 109.5      |
| O9 <sup>v</sup> —Nd2—O10 <sup>v</sup>   | 50.21 (10)  | N1—C21—H21B   | 109.5      |
| O9 <sup>v</sup> —Nd2—C13 <sup>iii</sup> | 88.06 (13)  | N1—C21—H21C   | 109.5      |
| O9 <sup>v</sup> —Nd2—C12 <sup>v</sup>   | 25.09 (12)  | H21A—C21—H21B | 109.5      |
| O19—Nd2—Nd2 <sup>iii</sup>              | 117.70 (11) | H21A—C21—H21C | 109.5      |
| O19—Nd2—O11 <sup>iii</sup>              | 139.65 (12) | H21B—C21—H21C | 109.5      |
| O19—Nd2—O12 <sup>iii</sup>              | 143.93 (13) | N1—C20—H20A   | 109.5      |
| O19—Nd2—O10 <sup>v</sup>                | 89.20 (14)  | N1—C20—H20B   | 109.5      |
| O19—Nd2—O9 <sup>v</sup>                 | 73.26 (14)  | N1—C20—H20C   | 109.5      |
| O19—Nd2—C13 <sup>iii</sup>              | 151.18 (13) | H20A—C20—H20B | 109.5      |

|                                            |            |               |       |
|--------------------------------------------|------------|---------------|-------|
| O19—Nd2—C12 <sup>v</sup>                   | 80.48 (14) | H20A—C20—H20C | 109.5 |
| C13 <sup>iii</sup> —Nd2—Nd2 <sup>iii</sup> | 59.81 (9)  | H20B—C20—H20C | 109.5 |

Symmetry code(s): (i)  $-x+1, -y+1, -z+1$ ; (ii)  $x-1/2, -y+1/2, z-1/2$ ; (iii)  $-x+2, -y+1, -z+2$ ; (iv)  $-x+1, -y+1, -z+2$ ; (v)  $x+1, y, z$ ; (vi)  $x+1/2, -y+1/2, z+1/2$ ; (vii)  $x-1, y, z$ .

**Table S15**

**Number and positions of Hydrogen bonds [ $\text{\AA}$  and  $^\circ$ ] in CP 5.**

| $D-H\cdots A$                       | $D-H$ ( $\text{\AA}$ ) | $H\cdots A$ ( $\text{\AA}$ ) | $D\cdots A$ ( $\text{\AA}$ ) | $D-H\cdots A$ ( $^\circ$ ) |
|-------------------------------------|------------------------|------------------------------|------------------------------|----------------------------|
| O19—H19A $\cdots$ O20 <sup>i</sup>  | 0.87                   | 2.13                         | 2.760 (6)                    | 128.1                      |
| O19—H19B $\cdots$ O21 <sup>ii</sup> | 0.92                   | 1.95                         | 2.723 (7)                    | 141.0                      |
| O16—H16A $\cdots$ O10 <sup>i</sup>  | 0.87                   | 1.91                         | 2.746 (5)                    | 160.2                      |
| O18—H18B $\cdots$ O9                | 0.87                   | 2.05                         | 2.770 (5)                    | 139.6                      |
| O21—H21D $\cdots$ O22               | 0.85                   | 2.01                         | 2.847 (13)                   | 170.9                      |
| O21—H21E $\cdots$ O7                | 0.85                   | 2.01                         | 2.810 (6)                    | 156.5                      |

Symmetry code(s): (i)  $x+1, y, z$ ; (ii)  $-x+1, -y+1, -z+1$ .

**Table S 16**

Contact contributions calculated for 2,5-FDA<sup>2-</sup> in 1 and reference structures taken from the literature (CSD ref. codes: YADGUH, FURDCA, UFALIZ, UFALOF)

| Compound /<br>CSD refcode     | 2,5-FDA <sup>2-</sup> |        | H <sub>2</sub> -2,5-FDA |        |        |
|-------------------------------|-----------------------|--------|-------------------------|--------|--------|
|                               | 1                     | YADGUH | FURDCA                  | UFALIZ | UFALOF |
| O $\cdots$ H/<br>H $\cdots$ O | 56.1                  | 59.2   | 54.2                    | 50.9   | 51.7   |
| H $\cdots$ H                  | 17.5                  | 15.1   | 8.0                     | 23.9   | 16.1   |

|                 |     |     |      |      |      |
|-----------------|-----|-----|------|------|------|
| C...H/<br>H...C | 9.4 | 7.7 | 9.9  | 15.6 | 14.2 |
| C...C           | 5.1 | 8.7 | 4.8  | 0.6  | 2.0  |
| C...O/<br>O...C | 6.8 | 6.8 | 13   | 4.7  | 9.8  |
| O...O           | 8.4 | 2.5 | 10.1 | 3.0  | 4.7  |
